# Supplementary material for: Single nucleotide polymorphism of MTHFR rs1801133 associated with elevated Hcy levels affects susceptibility to cerebral small vessel disease
Source: PeerJ. 2020 Feb 20;8:e8627. doi: 10.7717/peerj.8627 (PMC7036271; doi:10.7717/peerj.8627)
Supplement: Supplemental Information 1 [file peerj-08-8627-s001.xls]

## Sheet: Sheet1
No.of patients	Grouping	Age (Years)	Gender	BMI (Kg/m2)	Annual family income(RMB)	Educational level	Occupation	Drinking	Hyperlipidaemia	Total cholesterol (mmol/L)	TG (mmol/L)	LDL-C (mmol/L)	HDL-C (mmol/L)	Hypertension	Diabetes	Smoking	SBP (mmHg)	DBP (mmHg)	FBG (mmol/L)	rs1801133	rs1801131	rs2274976	rs4846048	rs4846049	rs13306561	rs3737964	Plasma Hcy levels
1	Case group	63	Male	22.18	9000	Primary school and below	Farmer	Yes	Yes	4.45	1.54	2.62	1.24	Yes	Yes	Yes	164	110	6.62	CC	AA	AA	AA	GG	CC	AG	14.96
2	Case group	54	Female	21.41	24000	Senior high school and above	Civil servant	No	No	5.62	1.84	2.98	0.86	No	No	No	134	80	7.64	TT	AC	GG	AG	GT	TT	GG	30.43
3	Case group	51	Female	22.58	25000	Senior high school and above	Civil servant	No	No	3.82	0.69	1.59	0.74	No	No	No	134	80	5.32	TT	AC	GG	AG	GT	TT	GG	21.33
4	Case group	47	Male	14.95	5800	Primary school and below	Farmer	Yes	Yes	1.86	0.72	1.09	0.96	Yes	Yes	Yes	154	100	5.32	CC	AA	AG	AA	GG	CT	AG	15.34
5	Case group	48	Male	19.28	9500	Primary school and below	Farmer	Yes	Yes	4.97	0.85	2.78	0.92	Yes	Yes	Yes	168	114	6.94	CC	AA	AG	AA	GG	CT	AG	5.75
6	Case group	78	Female	24.21	14000	Primary school and below	Farmer	No	No	4.39	1.53	1.82	0.94	No	No	No	132	78	7.68	CT	AA	GG	AA	GG	TT	GG	14.72
7	Case group	53	Male	22.79	25000	Primary school and below	Farmer	Yes	Yes	4.71	0.97	1.97	2.13	Yes	Yes	Yes	156	102	7.54	CC	AA	AG	AA	GG	CT	AG	16.73
8	Case group	54	Male	24.32	29000	Primary school and below	Farmer	Yes	Yes	3.92	0.85	6.63	0.64	Yes	Yes	Yes	176	122	5.83	CC	AA	AG	AA	GG	CT	AG	17.46
9	Case group	62	Female	22.95	26000	Primary school and below	Farmer	No	No	4.48	0.84	6.11	1.51	No	No	No	138	84	8.51	CT	AA	GG	AA	GG	TT	GG	27.66
10	Case group	63	Female	22.78	28000	Junior high school	Farmer	No	No	2.67	1.69	3.07	0.93	No	No	No	128	74	4.73	CT	AA	GG	AA	GG	TT	GG	19.43
11	Case group	49	Male	22.47	8500	Primary school and below	Farmer	Yes	Yes	8.15	0.94	0.45	0.85	Yes	Yes	Yes	180	126	7.17	CC	AA	AG	AA	GG	CT	AG	21.37
12	Case group	56	Male	17.93	31000	Primary school and below	Farmer	Yes	Yes	5.56	1.49	2.71	0.64	Yes	Yes	Yes	166	112	5.67	CC	AA	GG	AA	GG	TT	AG	15.38
13	Case group	73	Female	26.18	6500	Primary school and below	Farmer	Yes	Yes	4.48	0.54	3.94	0.74	Yes	Yes	Yes	182	128	8.72	CC	AA	AA	AA	GG	CC	AG	15.37
14	Case group	70	Male	23.68	13000	Junior high school	Worker	No	No	4.97	0.83	2.74	1.42	No	No	No	132	78	7.43	CT	AA	GG	AA	GG	TT	GG	27.43
15	Case group	71	Male	24.13	15000	Junior high school	Worker	No	No	5.15	0.74	1.58	0.79	No	No	No	136	82	5.94	CT	AA	GG	AA	GG	TT	GG	5.81
16	Case group	62	Male	24.52	14000	Junior high school	Worker	No	No	5.44	1.35	2.79	1.17	No	No	No	138	84	3.73	CT	AA	GG	AA	GG	TT	GG	17.46
17	Case group	74	Female	17.93	7000	Primary school and below	Farmer	Yes	Yes	4.67	7.68	3.26	1.51	Yes	Yes	Yes	178	124	3.97	CC	AA	AG	AA	GG	CT	AG	16.41
18	Case group	55	Male	26.18	32000	Primary school and below	Farmer	Yes	Yes	4.96	1.36	3.52	0.73	Yes	Yes	Yes	172	118	7.48	CC	AA	AG	AA	GG	CT	AG	11.75
19	Case group	61	Female	15.66	6000	Primary school and below	Farmer	Yes	Yes	4.45	1.12	3.38	1.62	Yes	Yes	Yes	172	118	13.54	CC	AA	AG	AA	GG	CT	AG	14.87
20	Case group	62	Female	19.14	7500	Primary school and below	Farmer	Yes	Yes	5.37	0.79	1.87	0.74	Yes	Yes	Yes	166	112	7.37	CC	AA	AG	AA	GG	CT	AG	16.87
21	Case group	65	Male	25.47	28000	Primary school and below	Farmer	Yes	Yes	4.78	0.52	3.01	0.58	Yes	Yes	Yes	172	118	6.47	CT	AA	GG	AA	GG	TT	GG	5.83
22	Case group	67	Male	22.86	30000	Primary school and below	Farmer	Yes	Yes	4.92	1.84	3.42	0.82	Yes	Yes	Yes	168	114	4.92	CT	AA	GG	AA	GG	TT	GG	17.44
23	Case group	63	Female	20.27	8000	Primary school and below	Farmer	Yes	Yes	4.59	0.68	2.92	1.83	Yes	Yes	Yes	174	120	6.45	CC	AA	AG	AA	GG	CT	AG	18.47
24	Case group	63	Male	26.15	21000	Primary school and below	Farmer	Yes	Yes	5.29	1.46	1.83	1.06	Yes	Yes	Yes	162	108	7.74	CT	AA	GG	AA	GG	TT	GG	20.55
25	Case group	50	Male	23.13	26000	Primary school and below	Farmer	No	No	1.64	1.12	2.32	1.73	No	No	No	138	84	6.59	CT	AA	GG	AA	GG	TT	GG	16.76
26	Case group	67	Male	21.95	25000	Senior high school and above	Civil servant	No	No	3.95	1.63	1.59	1.41	No	No	No	136	82	5.85	TT	AC	GG	AG	GT	TT	GG	18.64
27	Case group	64	Female	21.39	9000	Primary school and below	Farmer	Yes	Yes	3.38	1.63	2.14	1.42	Yes	Yes	Yes	164	110	9.74	CC	AA	AG	AA	GG	CT	AG	12.67
28	Case group	46	Male	14.76	8000	Primary school and below	Farmer	Yes	Yes	5.37	2.68	3.71	2.36	Yes	Yes	Yes	168	114	11.51	CC	AA	AG	AA	GG	CC	AG	26.79
29	Case group	78	Male	13.89	5000	Primary school and below	Farmer	Yes	Yes	4.59	1.12	1.53	0.78	Yes	Yes	Yes	174	120	1.73	CC	AA	AG	AA	GG	CT	AG	18.47
30	Case group	79	Male	17.42	7000	Primary school and below	Farmer	Yes	Yes	3.38	0.79	2.44	1.14	Yes	Yes	Yes	164	110	5.74	CC	AA	AG	AA	GG	CT	AG	14.53
31	Case group	65	Female	16.69	9500	Primary school and below	Farmer	Yes	Yes	9.62	1.72	2.67	0.79	Yes	Yes	Yes	148	94	1.68	CC	AA	AG	AA	GG	CT	AG	27.62
32	Case group	66	Male	23.17	29000	Primary school and below	Farmer	Yes	Yes	7.84	1.53	2.16	1.39	Yes	Yes	Yes	182	128	5.85	CT	AA	GG	AA	GG	TT	GG	16.61
33	Case group	66	Female	23.42	8000	Primary school and below	Farmer	Yes	Yes	4.73	1.85	0.68	0.58	Yes	Yes	Yes	184	130	7.43	CC	AA	AG	AA	GG	CT	AG	16.87
34	Case group	51	Male	29.37	6500	Primary school and below	Farmer	Yes	Yes	4.73	1.63	2.16	1.07	Yes	Yes	Yes	172	118	7.75	CC	AA	AG	AA	GG	CT	AG	6.75
35	Case group	67	Female	26.15	18000	Primary school and below	Farmer	Yes	Yes	1.86	0.94	2.46	1.39	Yes	Yes	Yes	152	98	5.94	CC	AA	AG	AA	GG	CT	AG	18.47
36	Case group	68	Female	22.98	17500	Primary school and below	Farmer	No	Yes	4.97	1.26	2.19	1.42	Yes	Yes	Yes	162	108	2.73	CC	AA	AG	AA	GG	CT	AG	14.53
37	Case group	54	Male	21.27	22000	Primary school and below	Farmer	No	No	4.06	0.72	6.38	0.71	No	No	No	134	80	3.96	CT	AA	GG	AA	GG	TT	GG	12.89
38	Case group	55	Male	21.96	24000	Primary school and below	Farmer	No	No	4.17	0.85	1.87	0.68	No	No	No	132	78	9.88	CT	AA	GG	AA	GG	TT	GG	13.56
39	Case group	56	Male	24.38	12000	Primary school and below	Farmer	No	No	7.28	0.94	1.92	1.47	No	No	No	138	84	8.64	CT	AA	GG	AA	GG	TT	GG	18.02
40	Case group	69	Female	25.47	15000	Primary school and below	Farmer	No	Yes	5.15	0.92	1.73	1.41	Yes	Yes	Yes	156	102	2.14	CC	AA	AG	AA	GG	CT	AG	11.58
41	Case group	58	Male	23.47	11500	Junior high school	Farmer	No	No	7.48	1.37	2.67	1.78	No	No	No	138	84	7.35	CT	AA	GG	AA	GG	TT	GG	14.46
42	Case group	59	Male	24.21	13000	Junior high school	Worker	No	No	4.67	1.48	2.68	0.77	No	No	No	128	74	2.28	CT	AA	GG	AA	GG	TT	GG	15.55
43	Case group	70	Female	23.17	16000	Primary school and below	Farmer	No	Yes	8.44	0.53	0.82	1.27	Yes	Yes	Yes	158	104	3.96	CC	AA	GG	AA	GG	TT	AG	12.75
44	Case group	57	Male	15.66	42000	Primary school and below	Farmer	Yes	Yes	5.74	2.71	1.98	2.06	Yes	Yes	Yes	162	108	7.19	CT	AA	GG	AA	GG	TT	AG	17.04
45	Case group	58	Male	19.14	37000	Primary school and below	Farmer	Yes	Yes	5.82	7.24	1.59	1.89	Yes	Yes	Yes	176	122	6.47	CT	AA	GG	AA	GG	TT	AG	26.92
46	Case group	62	Male	23.42	22000	Primary school and below	Farmer	Yes	Yes	4.75	1.35	1.56	1.15	Yes	Yes	Yes	182	128	7.26	CT	AA	GG	AA	GG	TT	GG	8.9
47	Case group	61	Female	26.17	33000	Senior high school and above	Civil servant	No	No	3.95	1.71	2.27	1.51	No	No	No	132	78	2.48	TT	AC	GG	AG	GT	TT	GG	20.54
48	Case group	80	Male	28.14	6000	Primary school and below	Farmer	Yes	Yes	8.62	0.68	1.27	1.12	Yes	Yes	Yes	162	108	6.82	CC	AA	AG	AA	GG	CT	AG	11.58
49	Case group	57	Male	23.93	11000	Primary school and below	Farmer	No	No	4.39	1.26	2.14	0.52	No	No	No	134	80	5.63	CT	AA	GG	AA	GG	TT	GG	18.45
50	Case group	68	Male	23.69	15000	Junior high school	Worker	No	No	4.73	3.24	3.07	1.74	No	No	No	134	80	2.74	CT	AA	GG	AA	GG	TT	GG	14.67
51	Case group	54	Female	21.95	28000	Senior high school and above	Doctor	No	No	4.28	0.83	3.98	2.03	No	No	No	136	72	1.74	TT	AC	GG	AG	GT	TT	GG	39.23
52	Case group	63	Female	21.84	24000	Senior high school and above	Teacher	No	No	5.39	0.94	3.45	1.42	No	No	No	138	84	9.61	TT	AC	GG	AG	GT	TT	GG	18.15
53	Case group	69	Male	23.57	14000	Junior high school	Worker	No	No	1.86	2.36	9.74	1.02	No	No	No	130	76	1.68	CT	AA	GG	AA	GG	TT	GG	18.81
54	Case group	73	Male	23.84	16000	Junior high school	Worker	No	No	4.58	0.46	0.63	0.78	No	No	No	132	78	7.68	CT	AA	GG	AA	GG	TT	GG	17.86
55	Case group	64	Female	24.13	25000	Junior high school	Worker	No	No	4.06	1.46	1.55	1.93	No	No	No	132	78	10.22	CT	AA	GG	AA	GG	TT	GG	19.37
56	Case group	60	Male	22.95	14000	Junior high school	Worker	No	No	7.45	0.97	5.46	1.93	No	No	No	138	84	11.72	CT	AA	GG	AA	GG	TT	GG	15.77
57	Case group	67	Male	23.47	16000	Junior high school	Worker	No	No	5.62	2.71	3.11	1.62	No	No	No	130	76	6.45	CT	AA	GG	AA	GG	TT	GG	19.54
58	Case group	65	Female	24.52	28000	Junior high school	Worker	No	No	4.17	2.49	2.89	1.12	No	No	No	134	80	5.37	CT	AA	GG	AA	GG	TT	GG	23.76
59	Case group	74	Male	23.72	18000	Junior high school	Worker	No	No	4.69	1.49	1.73	1.63	No	No	No	138	84	17.51	CT	AA	GG	AA	GG	TT	GG	22.45
60	Case group	64	Male	22.96	17000	Junior high school	Worker	No	No	4.71	1.52	2.55	1.12	No	No	No	136	82	4.73	CT	AA	GG	AA	GG	TT	GG	27.49
61	Case group	65	Male	22.73	16000	Junior high school	Worker	No	No	3.92	0.53	2.49	1.07	No	No	No	134	80	1.74	CT	AA	GG	AA	GG	TT	GG	26.95
62	Case group	71	Female	22.86	14000	Primary school and below	Farmer	No	Yes	4.58	1.84	3.11	1.59	Yes	Yes	Yes	150	96	7.88	CT	AA	GG	AA	GG	TT	AG	17.69
63	Case group	62	Female	22.92	12000	Primary school and below	Farmer	No	Yes	4.69	1.69	6.07	0.53	Yes	Yes	Yes	162	108	12.64	CT	AA	GG	AA	GG	TT	AG	8.83
64	Case group	64	Male	22.98	25000	Primary school and below	Farmer	Yes	Yes	4.37	1.49	2.94	0.95	Yes	Yes	Yes	168	114	5.39	CT	AA	GG	AA	GG	TT	GG	17.69
65	Case group	73	Female	23.47	11000	Primary school and below	Farmer	No	Yes	4.71	0.71	1.82	0.82	Yes	Yes	Yes	158	104	5.63	CT	AA	GG	AA	GG	TT	AG	16.61
66	Case group	56	Female	24.18	15000	Primary school and below	Farmer	No	Yes	3.92	0.86	2.74	0.65	Yes	Yes	Yes	158	104	11.35	CT	AA	GG	AA	GG	TT	AG	17.44
67	Case group	64	Male	22.78	15000	Junior high school	Worker	No	No	5.37	0.85	3.19	0.86	No	No	No	134	80	3.97	CT	AA	GG	AA	GG	TT	GG	17.57
68	Case group	65	Male	23.06	17000	Junior high school	Worker	No	No	4.59	1.36	1.73	0.74	No	No	No	134	80	12.54	CT	AA	GG	AA	GG	TT	GG	19.7
69	Case group	66	Male	23.38	16500	Junior high school	Worker	No	No	3.38	1.49	1.82	1.51	No	No	No	128	74	7.37	CT	AA	GG	AA	GG	TT	GG	6.06
70	Case group	62	Female	23.95	13000	Primary school and below	Farmer	No	Yes	4.96	3.36	1.58	1.74	Yes	Yes	Yes	162	108	6.28	CT	AA	GG	AA	GG	TT	GG	19.47
71	Case group	68	Male	22.92	32000	Primary school and below	Farmer	Yes	Yes	5.07	1.69	3.57	2.41	Yes	Yes	Yes	174	120	5.03	CT	AA	GG	AA	GG	TT	GG	25.47
72	Case group	49	Male	22.79	27000	Primary school and below	Farmer	No	No	3.58	7.68	2.45	0.82	No	No	No	136	82	5.59	CT	AA	GG	AA	GG	TT	GG	8.83
73	Case group	63	Female	22.79	14000	Primary school and below	Farmer	No	Yes	5.56	0.83	2.79	1.76	Yes	Yes	Yes	180	126	8.72	CT	AA	GG	AA	GG	TT	GG	13.66
74	Case group	50	Male	24.69	7500	Primary school and below	Farmer	Yes	Yes	2.44	1.26	2.36	1.35	Yes	Yes	Yes	156	102	8.22	CC	AA	AG	AA	GG	CT	AG	12.64
75	Case group	51	Male	25.02	36000	Primary school and below	Farmer	Yes	Yes	4.58	1.37	1.74	1.94	Yes	Yes	Yes	152	98	5.37	CC	AA	AG	AA	GG	CT	AG	15.58
76	Case group	52	Male	21.24	27000	Primary school and below	Farmer	Yes	Yes	4.69	0.48	0.58	0.65	Yes	Yes	Yes	174	120	2.84	CC	AA	AG	AA	GG	CT	AG	12.59
77	Case group	61	Female	23.13	16500	Primary school and below	Farmer	No	Yes	5.74	0.74	1.64	0.85	Yes	Yes	Yes	168	114	5.97	CT	AA	GG	AA	GG	TT	GG	18.44
78	Case group	59	Male	20.27	42000	Primary school and below	Farmer	Yes	Yes	3.52	6.36	2.67	1.52	Yes	Yes	Yes	158	104	6.33	CT	AA	GG	AA	GG	TT	AG	8.33
79	Case group	60	Male	21.39	48000	Primary school and below	Farmer	Yes	Yes	1.68	0.83	4.78	1.44	Yes	Yes	Yes	162	108	7.26	CT	AA	GG	AA	GG	TT	AG	28.87
80	Case group	61	Male	16.69	23000	Primary school and below	Farmer	Yes	Yes	2.43	0.74	2.95	1.37	Yes	Yes	Yes	170	116	5.58	CT	AA	GG	AA	GG	TT	AG	14.31
81	Case group	65	Female	22.74	17500	Primary school and below	Farmer	No	Yes	5.82	1.35	2.73	0.71	Yes	Yes	Yes	150	96	8.54	CT	AA	GG	AA	GG	TT	GG	17.56
82	Case group	66	Female	25.38	18000	Primary school and below	Farmer	No	No	3.52	1.46	1.55	1.69	Yes	Yes	Yes	168	114	7.37	CT	AA	GG	AA	GG	TT	GG	14.83
83	Case group	69	Male	22.69	14000	Junior high school	Worker	No	No	5.82	0.86	2.39	1.35	No	No	No	132	78	6.94	TT	AA	GG	AA	GG	TT	GG	31.74
84	Case group	66	Female	23.84	31000	Junior high school	Worker	No	No	4.28	1.52	7.04	1.07	No	No	No	138	84	6.84	CT	AA	GG	AA	GG	TT	GG	19.24
85	Case group	57	Male	16.54	30000	Junior high school	Worker	No	No	3.63	0.71	2.74	0.48	No	No	No	134	80	10.33	TT	AA	GG	AA	GT	TT	GG	18.1
86	Case group	71	Female	23.93	16000	Primary school and below	Farmer	No	No	4.17	1.69	2.39	1.63	No	No	No	136	82	5.94	CT	AA	GG	AA	GG	TT	GG	12.83
87	Case group	71	Male	14.76	30000	Senior high school and above	Teacher	No	No	2.39	1.26	1.56	0.82	No	No	No	128	74	10.49	TT	AC	GG	AG	GT	TT	GG	22.41
88	Case group	67	Female	23.72	30000	Junior high school	Worker	No	No	8.39	0.53	2.87	0.96	No	No	No	136	82	7.54	CT	AA	GG	AA	GG	TT	GG	13.43
89	Case group	58	Male	19.47	18500	Junior high school	Worker	No	No	4.78	0.52	1.09	2.06	No	No	No	130	76	7.48	TT	AA	GG	AA	GT	TT	GG	20.43
90	Case group	72	Male	13.89	25000	Senior high school and above	Teacher	No	No	4.48	2.36	2.83	1.73	No	No	No	126	72	8.27	TT	AC	GG	AG	GT	TT	GG	17.54
91	Case group	68	Male	17.42	26000	Senior high school and above	Teacher	No	No	4.67	0.83	2.94	1.64	No	No	No	124	70	2.59	TT	AC	GG	AG	GT	TT	GG	21.68
92	Case group	72	Female	23.47	15000	Primary school and below	Farmer	No	No	2.28	1.52	1.73	0.86	No	No	No	134	80	6.73	CT	AA	GG	AA	GG	TT	GG	28.45
93	Case group	64	Female	23.06	32000	Junior high school	Worker	No	No	1.46	0.71	2.82	1.28	No	No	No	134	80	5.74	CT	AA	GG	AA	GG	TT	GG	18.47
94	Case group	69	Male	23.47	22000	Primary school and below	Farmer	Yes	No	3.63	1.71	1.54	1.27	Yes	Yes	No	170	116	6.18	CT	AA	GG	AA	GG	TT	GG	13.66
95	Case group	65	Female	23.38	31000	Junior high school	Worker	No	No	3.58	0.86	2.74	2.03	No	No	No	136	82	6.82	CT	AA	GG	AA	GG	TT	GG	19.5
96	Case group	62	Female	23.57	36000	Junior high school	Worker	No	No	3.82	1.74	8.64	2.36	No	No	No	134	80	7.94	CT	AA	GG	AA	GG	TT	GG	8.45
97	Case group	70	Male	19.76	16000	Junior high school	Worker	No	No	3.52	2.36	2.62	1.94	No	No	No	134	80	7.17	TT	AA	GG	AA	GG	TT	GG	17.18
98	Case group	68	Female	21.27	16000	Primary school and below	Farmer	No	No	1.82	1.52	3.04	0.52	Yes	No	No	174	120	2.74	CT	AA	GG	AA	GG	TT	GG	16.76
99	Case group	70	Male	24.18	24000	Primary school and below	Farmer	Yes	No	2.29	0.86	2.96	0.57	Yes	No	No	166	112	7.49	CT	AA	GG	AA	GG	TT	GG	18.44
100	Case group	71	Male	23.95	29000	Primary school and below	Farmer	Yes	No	3.46	1.54	3.12	1.03	Yes	No	No	168	114	12.27	CT	AA	GG	AA	GG	TT	GG	17.56
101	Case group	69	Female	21.96	19500	Primary school and below	Farmer	No	No	3.95	4.93	2.87	1.78	No	No	No	134	80	5.68	CT	AA	GG	AA	GG	TT	GG	17.42
102	Case group	71	Male	20.58	15000	Junior high school	Worker	No	No	3.68	0.83	3.71	1.76	No	No	No	128	74	9.22	TT	AA	GG	AA	GG	TT	GG	11.77
103	Case group	52	Male	20.98	19000	Junior high school	Worker	No	No	4.37	1.49	2.16	0.65	No	No	No	136	82	5.83	TT	AA	GG	AA	GT	TT	GG	28.34
104	Case group	63	Female	23.68	23000	Junior high school	Worker	No	No	3.95	3.35	1.73	0.78	No	No	No	134	80	7.17	CT	AA	GG	AA	GG	TT	GG	23.74
105	Case group	62	Female	22.96	25000	Junior high school	Worker	No	No	4.48	0.84	1.68	0.92	No	No	No	138	84	5.83	CT	AA	GG	AA	GG	TT	GG	11.78
106	Case group	66	Male	20.92	14000	Junior high school	Worker	No	No	4.96	1.84	3.04	0.96	No	No	No	130	76	6.82	TT	AA	GG	AA	GG	TT	GG	19.91
107	Case group	68	Female	15.79	26000	Senior high school and above	Worker	No	No	5.37	0.79	3.63	1.78	No	No	No	136	82	5.97	TT	AC	GG	AG	GT	TT	GG	10.1
108	Case group	64	Male	26.17	36000	Senior high school and above	Worker	No	No	7.64	1.12	3.52	0.58	No	No	No	138	84	7.74	TT	AC	GG	AG	GT	TT	GG	21.32
109	Case group	64	Female	16.54	21000	Senior high school and above	Civil servant	No	No	4.59	1.52	3.52	0.75	No	No	No	134	80	4.49	TT	AC	GG	AG	GT	TT	GG	9.76
110	Case group	70	Male	21.24	28000	Senior high school and above	Doctor	No	No	4.17	0.69	2.45	1.84	No	No	No	136	82	2.63	TT	CC	GG	AA	TT	TT	GG	31.82
111	Case group	61	Female	25.86	30000	Senior high school and above	Doctor	No	No	4.17	2.36	1.09	1.23	No	No	No	136	84	10.56	TT	AC	GG	AG	GT	TT	GG	27.63
112	Case group	67	Male	21.67	13000	Junior high school	Worker	No	No	5.56	0.69	2.87	0.92	No	No	No	126	72	7.75	TT	AA	GG	AA	GG	TT	GG	34.79
113	Case group	55	Male	21.41	23000	Junior high school	Worker	No	No	2.46	1.54	1.97	0.66	No	No	No	134	80	6.58	TT	AA	GG	AG	GT	TT	GG	16.43
114	Case group	57	Female	23.95	17000	Primary school and below	Farmer	No	No	2.68	0.49	2.49	1.47	Yes	No	No	176	122	6.45	CT	AA	GG	AA	GG	TT	GG	13.36
115	Case group	60	Female	24.38	19000	Primary school and below	Farmer	No	No	4.06	4.84	1.64	1.84	No	No	No	132	78	10.43	CT	AA	GG	AA	GG	TT	GG	16.56
116	Case group	60	Male	22.58	32000	Senior high school and above	Worker	No	No	3.58	0.68	3.63	0.95	No	No	No	132	78	8.26	TT	AC	GG	AG	GT	TT	GG	30.89
117	Case group	71	Male	22.79	45000	Senior high school and above	Civil servant	No	No	6.28	1.71	2.32	0.91	No	No	No	138	84	7.35	TT	CC	GG	AA	TT	TT	GG	43.42
118	Case group	70	Female	20.78	22000	Senior high school and above	Civil servant	No	No	3.38	2.53	1.71	1.93	No	No	No	138	84	7.89	TT	AC	GG	AG	GT	TT	GG	6.43
119	Case group	69	Male	22.01	28000	Senior high school and above	Civil servant	No	No	4.17	0.85	1.78	1.59	No	No	No	126	72	2.03	TT	AC	GG	AG	GT	TT	GG	22.57
120	Case group	70	Male	22.18	29000	Senior high school and above	Civil servant	No	No	4.28	1.04	2.95	0.73	No	No	No	132	78	6.18	TT	AC	GG	AG	GT	TT	GG	8.93
121	Case group	74	Male	28.14	24000	Senior high school and above	Teacher	No	No	3.46	0.74	3.01	1.76	No	No	No	136	82	7.59	TT	AC	GG	AG	GT	TT	GG	30.3
122	Case group	69	Female	23.47	30000	Junior high school	Worker	No	No	3.64	2.36	2.58	1.42	No	No	No	134	80	7.75	CT	AA	GG	AA	GG	TT	GG	7.62
123	Case group	72	Male	22.15	15000	Junior high school	Worker	No	No	5.74	1.71	1.64	0.85	No	No	No	128	74	2.32	TT	AA	GG	AA	GG	TT	GG	11.2
124	Case group	58	Male	20.78	21000	Junior high school	Worker	No	No	3.29	0.86	2.58	1.15	No	No	No	136	82	7.26	TT	AA	GG	AA	GT	TT	GG	5.76
125	Case group	57	Female	23.69	34000	Junior high school	Worker	No	No	2.73	0.83	2.79	0.79	No	No	No	138	84	5.32	CT	AA	GG	AA	GG	TT	GG	19.48
126	Case group	64	Male	29.37	25000	Senior high school and above	Teacher	No	No	3.58	1.35	2.16	0.85	No	No	No	130	76	11.43	TT	AC	GG	AG	GT	TT	GG	8.68
127	Case group	65	Male	14.95	22000	Senior high school and above	Teacher	No	No	3.64	1.46	3.42	0.71	No	No	No	132	78	5.64	TT	AC	GG	AG	GT	TT	GG	20.33
128	Case group	64	Female	20.98	23000	Junior high school	Worker	No	No	4.39	1.83	2.36	1.52	No	No	No	136	82	2.28	TT	AA	GG	AG	GT	TT	GG	20.43
129	Case group	65	Female	19.47	26000	Junior high school	Worker	No	No	6.48	0.74	2.74	1.44	No	No	No	138	84	3.26	TT	AA	GG	AG	GT	TT	GG	9.63
130	Case group	66	Male	19.28	32000	Senior high school and above	Doctor	No	No	1.73	1.49	5.57	0.58	No	No	No	132	78	4.14	TT	AC	GG	AG	GT	TT	GG	20.73
131	Case group	72	Male	24.32	32000	Senior high school and above	Civil servant	No	No	2.39	0.86	2.28	0.86	No	No	No	136	82	2.28	TT	CC	GG	AA	TT	TT	GG	7.62
132	Case group	53	Female	22.73	24000	Junior high school	Worker	No	No	7.67	2.69	2.39	0.85	No	No	No	128	74	7.48	TT	AA	GG	AA	GG	TT	GG	22.4
133	Case group	74	Male	21.54	12000	Junior high school	Worker	No	No	8.29	1.46	1.27	1.74	No	No	No	134	80	14.54	TT	AA	GG	AA	GT	TT	GG	3.7
134	Case group	62	Female	22.13	25000	Junior high school	Worker	No	No	4.97	0.86	0.89	2.06	No	No	No	134	80	6.49	TT	AA	GG	AA	GT	TT	GG	11.7
135	Case group	52	Male	25.38	23000	Primary school and below	Farmer	No	No	2.82	0.68	2.94	1.76	No	No	No	130	76	5.64	CT	AA	GG	AA	GG	TT	GG	19.42
136	Case group	62	Female	22.53	34000	Senior high school and above	Doctor	No	No	4.06	0.46	1.16	0.62	No	No	No	134	80	5.37	TT	AC	GG	AG	GT	TT	GG	9.22
137	Case group	65	Male	22.53	40000	Senior high school and above	Worker	No	No	3.73	0.79	3.71	1.39	No	No	No	136	82	5.39	TT	AC	GG	AG	GT	TT	GG	12.33
138	Case group	68	Male	21.84	27000	Senior high school and above	Civil servant	No	No	2.06	0.62	2.67	1.27	No	No	No	134	80	1.92	TT	AC	GG	AG	GT	TT	GG	20.44
139	Case group	64	Female	20.92	28000	Junior high school	Worker	No	No	4.45	1.71	1.62	1.35	No	No	No	134	80	5.67	TT	AA	GG	AA	GG	TT	GG	32.57
140	Case group	67	Female	22.69	38000	Junior high school	Worker	No	No	3.38	1.53	1.44	1.24	No	No	No	138	84	5.94	TT	AA	GG	AA	GT	TT	GG	21.82
141	Case group	67	Male	22.47	40000	Senior high school and above	Doctor	No	No	3.82	0.52	1.54	1.47	No	No	No	138	84	1.96	TT	AC	GG	AG	GT	TT	GG	31.32
142	Case group	65	Female	21.67	31000	Junior high school	Worker	No	No	5.37	0.86	1.71	0.98	No	No	No	136	82	7.19	TT	AA	GG	AA	GG	TT	GG	33.39
143	Case group	66	Female	22.15	39000	Junior high school	Worker	No	No	4.59	1.52	2.53	1.76	No	No	No	134	80	6.63	TT	AA	GG	AA	GT	TT	GG	7.28
144	Case group	68	Male	24.69	45000	Senior high school and above	Doctor	No	No	1.95	1.53	2.96	0.52	No	No	No	138	84	7.88	TT	AC	GG	AG	GT	TT	GG	30.36
145	Case group	69	Male	25.02	33000	Senior high school and above	Doctor	No	No	4.06	1.84	3.12	1.78	No	No	No	134	80	8.64	TT	CC	GG	AG	TT	TT	GG	29.82
146	Case group	59	Female	19.76	32000	Junior high school	Worker	No	No	5.62	0.84	3.27	0.64	No	No	No	134	80	15.31	TT	AA	GG	AA	GT	TT	GG	20.27
147	Case group	55	Male	21.32	24000	Junior high school	Worker	No	No	4.92	1.84	2.45	1.52	No	No	No	132	78	7.19	TT	AA	GG	AA	GT	TT	GG	34.07
148	Case group	56	Male	15.79	21000	Junior high school	Worker	No	No	5.07	4.69	3.36	0.94	No	No	No	138	84	6.47	TT	AA	GG	AA	GT	TT	GG	27.29
149	Case group	60	Female	20.58	35000	Junior high school	Worker	No	No	4.73	1.69	1.16	1.74	No	No	No	136	82	7.46	TT	AA	GG	AA	GT	TT	GG	15.77
150	Case group	53	Male	23.95	21000	Primary school and below	Farmer	No	No	1.95	1.63	2.26	0.85	No	No	No	132	78	4.14	CT	AA	GG	AA	GG	TT	GG	15.23
151	Case group	53	Female	21.54	22000	Junior high school	Worker	No	No	8.28	2.36	2.45	1.89	No	No	No	138	84	7.37	TT	AA	GG	AG	GT	TT	GG	22.34
152	Case group	61	Female	21.37	33000	Junior high school	Worker	No	No	5.86	1.31	1.09	1.65	No	No	No	138	84	13.82	TT	AA	GG	AA	GT	TT	GG	23.42
153	Case group	72	Male	21.37	14000	Junior high school	Worker	No	No	3.43	0.74	0.53	1.11	No	No	No	136	82	3.37	TT	AA	GG	AA	GT	TT	GG	23.42
154	Case group	73	Male	22.13	13000	Junior high school	Worker	No	No	4.75	1.35	2.48	0.64	No	No	No	134	80	2.84	TT	AA	GG	AA	GT	TT	GG	20.56
155	Case group	71	Female	20.56	28000	Junior high school	Worker	No	No	4.67	1.35	2.58	0.97	No	No	No	138	76	7.45	TT	AC	GG	AG	GT	TT	GG	34.07
156	Case group	54	Male	20.56	22000	Junior high school	Worker	No	No	4.84	1.53	2.95	0.88	No	No	No	134	80	5.67	TT	AA	GG	AA	GT	TT	GG	19.63
157	Case group	76	Female	21.32	27000	Senior high school and above	Worker	No	No	4.45	2.46	1.97	1.02	No	No	No	134	80	12.69	TT	AC	GG	AG	GT	TT	GG	30.49
158	Case group	51	Male	22.74	25000	Primary school and below	Farmer	No	No	3.73	0.79	1.28	2.14	No	No	No	136	82	6.43	CT	AA	GG	AA	GG	TT	GG	21.2
159	Case group	66	Male	25.86	24000	Senior high school and above	Civil servant	No	No	1.82	0.68	2.98	1.42	No	No	No	138	84	6.47	TT	AC	GG	AG	GT	TT	GG	18.42
160	Case group	56	Female	22.49	25000	Senior high school and above	Teacher	No	No	4.48	1.35	1.36	0.79	No	No	No	136	82	4.43	TT	AC	GG	AG	GT	TT	GG	7.08
161	Case group	67	Female	15.01	26000	Senior high school and above	Teacher	No	No	4.67	1.86	1.74	1.96	No	No	No	134	80	1.48	TT	CC	GG	AG	GT	TT	GG	17.35
162	Case group	68	Female	24.32	28000	Senior high school and above	Teacher	No	No	2.46	4.76	4.58	0.78	No	No	No	132	78	6.87	TT	CC	GG	AG	TT	TT	GG	7.73
163	Case group	59	Female	25.79	36000	Senior high school and above	Teacher	No	No	1.58	0.83	3.56	2.13	No	No	No	130	76	5.38	TT	CC	GG	AG	TT	TT	GG	37.13
1	Control group	61	Male	22.37	8000	Primary school and below	Farmer	Yes	Yes	4.62	1.67	2.69	0.74	Yes	Yes	Yes	160	108	6.69	CC	AA	AA	AA	GG	CC	AG	24.84
2	Control group	63	Female	22.37	24000	Primary school and below	Farmer	Yes	Yes	4.13	1.29	2.32	2.36	Yes	Yes	Yes	158	106	6.52	CC	AA	AA	AA	GG	CC	AG	6.25
3	Control group	48	Female	14.95	5000	Primary school and below	Farmer	Yes	Yes	5.54	2.81	2.78	2.36	Yes	Yes	Yes	164	112	7.58	CC	AA	AA	AA	GG	CT	AG	12.23
4	Control group	47	Male	14.95	21000	Primary school and below	Farmer	Yes	Yes	5.05	2.43	3.41	0.78	Yes	Yes	Yes	162	110	6.41	CC	AA	AA	AA	GG	CT	AG	10.82
5	Control group	76	Male	14.08	7000	Primary school and below	Farmer	Yes	Yes	4.76	1.25	1.6	0.78	Yes	Yes	Yes	168	116	5.8	CC	AA	AG	AA	GG	CT	AG	15.61
6	Control group	78	Female	14.08	30000	Primary school and below	Farmer	Yes	Yes	4.27	0.87	1.23	1.14	Yes	Yes	Yes	166	114	6.63	CC	AA	AG	AA	GG	CT	AG	3.75
7	Control group	78	Male	17.61	6000	Primary school and below	Farmer	Yes	Yes	3.55	0.92	2.51	2.63	Yes	Yes	Yes	166	114	5.81	CC	AA	AG	AA	GG	CT	AG	15.36
8	Control group	79	Male	17.61	21000	Primary school and below	Farmer	Yes	Yes	3.06	0.54	2.14	1.12	Yes	Yes	Yes	154	102	5.64	CC	AA	AG	AA	GG	CT	AG	23.39
9	Control group	79	Female	28.33	6500	Primary school and below	Farmer	Yes	Yes	5.79	0.81	1.34	1.12	Yes	Yes	Yes	160	108	6.89	CC	AA	AG	AA	GG	CT	AG	16.36
10	Control group	79	Female	28.33	23000	Primary school and below	Farmer	Yes	Yes	8.3	0.43	0.97	1.07	Yes	Yes	Yes	158	106	6.72	CC	AA	AG	AA	GG	CT	AG	15.48
11	Control group	50	Male	29.56	5800	Primary school and below	Farmer	Yes	Yes	4.9	1.76	1.23	1.07	Yes	Yes	Yes	172	120	7.82	CC	AA	AG	AA	GG	CT	AG	11.28
12	Control group	51	Male	29.56	32000	Primary school and below	Farmer	Yes	Yes	4.41	1.38	1.86	0.96	Yes	Yes	Yes	164	112	7.65	CC	AA	AG	AA	GG	CT	AG	14.68
13	Control group	46	Female	15.14	8000	Primary school and below	Farmer	Yes	Yes	2.03	0.85	1.16	0.96	Yes	Yes	Yes	176	124	5.39	CC	AA	AG	AA	GG	CT	AG	14.48
14	Control group	49	Male	15.14	36000	Primary school and below	Farmer	Yes	Yes	1.54	0.47	0.79	0.92	Yes	Yes	Yes	174	122	5.22	CC	AA	AG	AA	GG	CT	AG	19.12
15	Control group	49	Male	19.47	5000	Primary school and below	Farmer	Yes	Yes	5.14	0.98	2.85	1.92	Yes	Yes	Yes	160	108	7.01	CC	AA	AG	AA	GG	CT	AG	18.46
16	Control group	48	Male	19.47	40000	Primary school and below	Farmer	Yes	Yes	4.65	0.6	2.48	0.85	Yes	Yes	Yes	158	106	6.84	CC	AA	AG	AA	GG	CT	AG	17.34
17	Control group	48	Female	22.66	7000	Primary school and below	Farmer	Yes	Yes	8.32	1.07	0.52	0.85	Yes	Yes	Yes	166	114	7.24	CC	AA	AG	AA	GG	CT	AG	14.32
18	Control group	49	Male	22.66	24000	Primary school and below	Farmer	Yes	Yes	4.83	0.69	0.15	1.35	Yes	Yes	Yes	164	112	7.07	CC	AA	AG	AA	GG	CT	AG	13.15
19	Control group	50	Female	24.88	6000	Primary school and below	Farmer	Yes	Yes	2.61	1.39	2.43	1.35	Yes	Yes	Yes	170	118	8.29	CC	AA	AG	AA	GG	CT	AG	11.32
20	Control group	50	Female	24.88	25000	Primary school and below	Farmer	Yes	Yes	2.12	1.01	2.06	1.94	Yes	Yes	Yes	168	116	8.12	CC	AA	AG	AA	GG	CT	AG	10.81
21	Control group	51	Male	25.21	8000	Primary school and below	Farmer	Yes	Yes	4.75	1.5	1.81	1.94	Yes	Yes	Yes	180	128	5.44	CC	AA	AG	AA	GG	CT	AG	16.79
22	Control group	51	Male	25.21	27000	Primary school and below	Farmer	Yes	Yes	4.26	1.12	1.44	0.65	Yes	Yes	Yes	178	126	5.27	CC	AA	AG	AA	GG	CT	AG	11.48
23	Control group	51	Female	21.43	5000	Primary school and below	Farmer	Yes	Yes	4.86	0.61	0.65	1.76	Yes	Yes	Yes	166	114	6.91	CC	AA	AG	AA	GG	CT	AG	9.74
24	Control group	52	Male	21.43	28000	Primary school and below	Farmer	Yes	Yes	4.37	0.23	0.28	2.13	Yes	Yes	Yes	164	112	2.74	CC	AA	AG	AA	GG	CT	AG	15.94
25	Control group	52	Male	22.98	7000	Primary school and below	Farmer	Yes	Yes	4.88	1.1	2.04	2.13	Yes	Yes	Yes	172	120	7.61	CC	AA	AG	AA	GG	CT	AG	18.25
26	Control group	53	Male	22.98	29000	Primary school and below	Farmer	Yes	Yes	4.39	0.72	1.67	0.64	Yes	Yes	Yes	170	118	7.44	CC	AA	AG	AA	GG	CT	AG	16.37
27	Control group	53	Female	24.51	6000	Primary school and below	Farmer	Yes	Yes	4.09	0.98	6.7	0.64	Yes	Yes	Yes	188	136	5.9	CC	AA	AG	AA	GG	CT	AG	21.47
28	Control group	54	Male	24.51	30000	Primary school and below	Farmer	Yes	Yes	3.6	0.6	6.33	0.73	Yes	Yes	Yes	166	114	5.73	CC	AA	AG	AA	GG	CT	AG	12.38
29	Control group	54	Male	26.37	6500	Primary school and below	Farmer	Yes	Yes	5.13	1.49	1.59	0.73	Yes	Yes	Yes	178	126	7.55	CC	AA	AG	AA	GG	CT	AG	18.36
30	Control group	55	Male	26.37	25000	Primary school and below	Farmer	Yes	Yes	4.64	1.11	3.22	0.64	Yes	Yes	Yes	166	114	7.38	CC	AA	AG	AA	GG	TT	AG	13.47
31	Control group	55	Female	18.12	5800	Primary school and below	Farmer	Yes	Yes	5.73	1.62	2.78	1.65	Yes	Yes	Yes	166	114	5.74	CC	AA	AG	AA	GG	TT	AG	14.43
32	Control group	56	Male	18.12	26000	Primary school and below	Farmer	Yes	Yes	5.24	1.24	2.41	2.06	Yes	Yes	Yes	164	112	5.57	CC	AA	AG	AA	GG	TT	AG	13.69
33	Control group	56	Female	15.85	9500	Primary school and below	Farmer	Yes	Yes	5.91	2.84	2.05	2.06	Yes	Yes	Yes	160	108	7.26	CC	AA	GG	AA	GG	TT	AG	15.78
34	Control group	57	Male	15.85	24000	Primary school and below	Farmer	Yes	Yes	5.42	2.46	1.68	1.89	Yes	Yes	Yes	158	106	7.09	CC	AA	AG	AA	GG	TT	AG	14.26
35	Control group	57	Female	19.33	8500	Primary school and below	Farmer	Yes	Yes	5.99	6.37	1.66	1.89	Yes	Yes	Yes	174	122	6.54	CC	AA	GG	AA	GG	TT	AG	15.49
36	Control group	58	Female	19.33	25000	Primary school and below	Farmer	Yes	Yes	5.5	6.99	1.29	1.52	Yes	Yes	Yes	172	120	6.37	CC	AA	GG	AA	GG	TT	AG	21.46
37	Control group	58	Male	20.46	7500	Primary school and below	Farmer	Yes	Yes	3.69	6.49	2.74	1.52	Yes	No	No	172	120	6.4	CC	AA	GG	AA	GG	TT	AG	13.45
38	Control group	59	Male	20.46	22000	Primary school and below	Farmer	Yes	Yes	3.2	4.11	1.37	1.44	Yes	No	Yes	170	118	6.23	CC	AA	GG	AA	GG	TT	AG	17.62
39	Control group	59	Male	21.58	9500	Primary school and below	Farmer	Yes	Yes	1.85	0.96	4.85	1.44	No	No	No	136	84	7.33	CC	AA	GG	AA	GG	TT	AG	16.41
40	Control group	60	Female	21.58	32000	Primary school and below	Farmer	Yes	Yes	1.36	0.58	5.48	1.37	No	No	No	134	82	7.16	CC	AA	GG	AA	GG	TT	AG	12.29
41	Control group	60	Male	16.88	8500	Primary school and below	Farmer	Yes	Yes	2.6	1.87	3.02	2.37	No	No	No	134	82	5.65	CC	AA	GG	AA	GG	TT	AG	3.98
42	Control group	61	Male	16.88	40000	Primary school and below	Farmer	Yes	Yes	2.11	0.49	2.65	1.15	No	No	No	132	80	5.48	CC	AA	GG	AA	GG	TT	AG	14.77
43	Control group	61	Female	23.61	7500	Primary school and below	Farmer	Yes	No	4.92	1.48	1.63	1.15	No	No	No	136	84	7.33	CC	AA	GG	AA	GG	TT	GG	15.62
44	Control group	62	Male	23.61	45000	Primary school and below	Farmer	Yes	Yes	4.43	1.1	1.26	1.06	No	No	No	126	74	7.16	CC	AA	GG	AA	GG	TT	AG	17.46
45	Control group	62	Male	26.34	14000	Primary school and below	Farmer	Yes	No	5.46	1.59	1.9	1.06	No	No	No	130	78	7.81	CC	AA	GG	AA	GG	TT	GG	18.94
46	Control group	63	Male	26.34	33000	Primary school and below	Farmer	Yes	Yes	3.97	1.21	1.53	0.95	No	No	No	128	76	7.64	CC	AA	GG	AA	GG	TT	GG	16.34
47	Control group	63	Female	23.17	16500	Primary school and below	Farmer	Yes	No	4.54	1.62	3.01	0.95	No	No	No	132	80	5.46	CC	AA	GG	AA	GG	TT	GG	12.59
48	Control group	64	Male	23.17	28000	Primary school and below	Farmer	Yes	No	2.05	1.24	2.64	0.58	No	No	No	130	78	5.29	CC	AA	GG	AA	GG	TT	GG	9.63
49	Control group	66	Male	25.66	17500	Primary school and below	Farmer	Yes	No	4.95	0.65	2.08	0.58	No	No	No	130	78	6.54	CC	AA	GG	AA	GG	TT	GG	15.94
50	Control group	65	Male	25.66	45000	Primary school and below	Farmer	Yes	No	2.46	0.27	2.71	1.39	No	No	No	128	76	6.37	CC	AA	GG	AA	GG	TT	GG	16.73
51	Control group	67	Female	23.36	18000	Primary school and below	Farmer	Yes	No	8.01	1.66	2.23	1.39	No	No	No	136	84	5.92	CC	AA	GG	AA	GG	TT	GG	18.14
52	Control group	66	Female	23.36	32000	Primary school and below	Farmer	Yes	No	5.52	1.28	1.86	0.82	No	No	No	134	82	5.75	CC	AA	GG	AA	GG	TT	GG	16.37
53	Control group	68	Male	23.05	17000	Primary school and below	Farmer	Yes	No	5.09	1.97	3.49	0.82	No	No	No	132	80	4.99	CC	AA	GG	AA	GG	TT	GG	25.35
54	Control group	67	Male	23.05	36000	Primary school and below	Farmer	Yes	No	4.6	0.59	2.12	2.41	No	No	No	130	78	4.82	CC	AA	GG	AA	GG	TT	GG	18.38
55	Control group	67	Female	23.11	16000	Primary school and below	Farmer	Yes	No	5.24	1.82	3.64	2.41	No	No	No	136	84	5.1	CC	AA	GG	AA	GG	TT	GG	12.38
56	Control group	68	Male	23.11	27000	Primary school and below	Farmer	Yes	No	4.75	1.44	5.27	1.27	No	No	No	134	82	4.93	CC	AA	GG	AA	GG	TT	GG	3.73
57	Control group	67	Male	23.66	19500	Primary school and below	Farmer	No	No	3.8	1.84	1.61	1.27	No	No	No	128	76	6.25	CC	AA	GG	AA	GG	TT	GG	18.36
58	Control group	69	Female	23.66	25000	Primary school and below	Farmer	No	No	3.31	1.46	1.24	0.57	No	No	No	124	72	6.08	CC	AA	GG	AA	GG	TT	GG	3.38
59	Control group	69	Male	24.37	19000	Primary school and below	Farmer	No	No	2.46	0.99	3.03	1.59	No	No	No	136	84	7.56	CC	AA	GG	AA	GG	TT	GG	15.38
60	Control group	70	Male	24.37	29000	Primary school and below	Farmer	No	No	1.97	0.61	2.66	1.03	No	No	No	134	82	7.39	CC	AA	GG	AA	GG	TT	GG	14.43
61	Control group	70	Male	24.14	16000	Primary school and below	Farmer	No	No	3.63	1.67	3.19	0.53	No	No	No	136	84	8.34	CC	AA	GG	AA	GG	TT	GG	13.69
62	Control group	71	Female	24.14	27000	Primary school and below	Farmer	No	No	3.14	1.29	2.82	0.82	No	No	No	130	78	12.17	CC	AA	GG	AA	GG	TT	GG	15.78
63	Control group	48	Female	22.98	15000	Primary school and below	Farmer	No	No	3.75	7.81	2.52	0.82	No	No	No	132	80	5.66	CC	AA	GG	AA	GG	TT	GG	14.26
64	Control group	72	Male	24.51	24000	Senior high school and above	Farmer	No	No	2.07	0.61	1.98	1.42	No	No	No	120	68	2.18	CC	CC	GG	AG	TT	TT	GG	15.49
65	Control group	72	Female	26.37	6500	Primary school and below	Farmer	Yes	Yes	4.65	0.67	4.01	0.74	Yes	Yes	Yes	174	122	8.79	CC	AA	AA	AA	GG	CC	AG	13.48
66	Control group	73	Female	26.37	18000	Primary school and below	Farmer	Yes	Yes	4.16	0.29	5.64	1.41	Yes	Yes	Yes	154	102	8.62	CC	AA	AA	AA	GG	CC	AG	25.62
67	Control group	73	Male	18.12	7000	Primary school and below	Farmer	Yes	Yes	4.84	7.81	1.33	1.51	Yes	Yes	Yes	164	112	4.04	CC	AA	AG	AA	GG	CT	AG	12.38
68	Control group	74	Male	18.12	17500	Primary school and below	Farmer	Yes	Yes	4.35	7.43	3.96	2.27	Yes	Yes	Yes	172	120	6.87	CC	AA	AG	AA	GG	CT	AG	11.98
69	Control group	60	Male	15.85	6000	Primary school and below	Farmer	Yes	Yes	4.62	1.25	2.44	1.62	Yes	Yes	Yes	160	108	13.61	CC	AA	AG	AA	GG	CT	AG	22.73
70	Control group	61	Female	15.85	15000	Primary school and below	Farmer	Yes	Yes	4.13	0.87	3.08	1.59	Yes	Yes	Yes	168	116	10.44	CC	AA	AG	AA	GG	CT	AG	17.59
71	Control group	63	Male	19.33	7500	Primary school and below	Farmer	Yes	Yes	5.54	0.92	1.94	0.74	Yes	Yes	Yes	178	126	7.44	CC	AA	AG	AA	GG	CT	AG	9.48
72	Control group	62	Male	19.33	16000	Primary school and below	Farmer	Yes	Yes	5.05	0.54	1.57	0.53	Yes	Yes	Yes	176	124	7.27	CC	AA	AG	AA	GG	CT	AG	15.74
73	Control group	62	Female	20.46	8000	Primary school and below	Farmer	Yes	Yes	4.76	0.81	2.99	2.03	Yes	Yes	Yes	166	114	6.52	CC	AA	AG	AA	GG	CT	AG	11.29
74	Control group	63	Male	20.46	14000	Primary school and below	Farmer	Yes	Yes	4.27	0.43	1.62	1.82	Yes	Yes	Yes	164	112	6.35	CC	AA	AG	AA	GG	CT	AG	13.54
75	Control group	63	Male	21.58	9000	Primary school and below	Farmer	Yes	Yes	3.55	1.76	2.21	2.42	Yes	Yes	Yes	156	104	9.81	CC	AA	AG	AA	GG	CT	AG	11.95
76	Control group	64	Male	21.58	12000	Primary school and below	Farmer	Yes	Yes	3.06	1.38	1.84	0.65	Yes	Yes	Yes	168	116	9.64	CC	AA	AG	AA	GG	CT	AG	17.45
77	Control group	64	Female	16.88	9500	Primary school and below	Farmer	Yes	Yes	6.79	1.85	1.72	0.79	Yes	Yes	Yes	166	114	1.75	CC	AA	AG	AA	GG	CT	AG	25.44
78	Control group	65	Male	16.88	11000	Primary school and below	Farmer	Yes	Yes	9.3	1.47	2.37	1.74	Yes	Yes	Yes	184	132	1.58	CC	AA	AG	AA	GG	CT	AG	5.33
79	Control group	65	Male	23.61	8500	Primary school and below	Farmer	Yes	Yes	4.9	1.98	0.75	0.58	Yes	Yes	Yes	182	130	7.5	CC	AA	AG	AA	GG	CT	AG	15.32
80	Control group	66	Male	23.61	15000	Primary school and below	Farmer	Yes	Yes	4.41	1.6	0.38	1.76	Yes	Yes	Yes	180	128	7.33	CC	AA	AG	AA	GG	CT	AG	10.82
81	Control group	66	Female	26.34	7500	Primary school and below	Farmer	Yes	Yes	2.03	1.07	2.53	1.39	Yes	Yes	Yes	150	98	6.01	CC	AA	AG	AA	GG	CT	AG	15.61
82	Control group	67	Female	26.34	13000	Primary school and below	Farmer	Yes	Yes	3.54	0.69	2.16	0.85	Yes	Yes	Yes	164	112	5.84	CC	AA	AG	AA	GG	CT	AG	6.75
83	Control group	67	Male	23.17	6500	Primary school and below	Farmer	No	Yes	5.14	1.39	2.26	1.42	Yes	Yes	Yes	160	108	6.8	CC	AA	AG	AA	GG	CT	AG	15.36
84	Control group	68	Female	23.17	14000	Primary school and below	Farmer	No	Yes	4.65	1.01	1.89	0.51	Yes	Yes	Yes	178	126	2.63	CC	AA	AG	AA	GG	CT	AG	17.39
85	Control group	67	Male	25.66	7000	Primary school and below	Farmer	No	Yes	5.32	1.05	1.8	2.41	Yes	Yes	Yes	154	102	2.21	CC	AA	AG	AA	GG	TT	AG	16.36
86	Control group	69	Female	25.66	16500	Primary school and below	Farmer	No	Yes	4.83	0.67	1.43	1.69	Yes	Yes	Yes	152	100	2.04	CC	AA	AG	AA	GG	TT	AG	15.48
87	Control group	68	Male	23.36	6000	Primary school and below	Farmer	No	Yes	8.61	0.66	0.89	1.27	Yes	Yes	Yes	156	104	4.03	CC	AA	GG	AA	GG	TT	AG	11.28
88	Control group	70	Female	23.36	17500	Primary school and below	Farmer	No	Yes	8.12	0.28	0.52	1.47	Yes	Yes	Yes	168	116	3.86	CC	AA	GG	AA	GG	TT	AG	14.68
89	Control group	70	Male	23.05	7500	Primary school and below	Farmer	No	Yes	4.75	1.97	3.18	1.59	Yes	Yes	Yes	148	96	7.95	CC	AA	GG	AA	GG	TT	AG	15.34
90	Control group	71	Male	23.05	18000	Primary school and below	Farmer	No	Yes	4.26	1.59	2.81	0.52	Yes	Yes	Yes	160	108	7.78	CC	AA	GG	AA	GG	TT	AG	14.48
91	Control group	61	Male	23.11	8000	Primary school and below	Farmer	No	Yes	4.86	1.82	6.14	0.53	Yes	Yes	Yes	160	108	8.71	CC	AA	GG	AA	GG	TT	AG	19.12
92	Control group	62	Female	23.11	17000	Primary school and below	Farmer	No	Yes	2.37	1.44	5.77	1.78	Yes	Yes	Yes	158	106	8.54	CC	AA	GG	AA	GG	TT	AG	10.75
93	Control group	72	Female	23.66	9000	Primary school and below	Farmer	No	Yes	4.88	0.84	1.89	0.82	No	No	No	130	78	5.7	CC	AA	GG	AA	GG	TT	AG	24.46
94	Control group	73	Male	23.66	16000	Primary school and below	Farmer	No	No	4.39	0.46	1.52	0.93	No	No	No	132	80	5.53	CC	AA	GG	AA	GG	TT	AG	25.54
95	Control group	55	Female	24.37	9500	Primary school and below	Farmer	No	No	4.09	0.99	2.81	1.73	No	No	No	134	82	11.42	CC	AA	GG	AA	GG	TT	GG	16.37
96	Control group	56	Female	24.37	19500	Primary school and below	Farmer	No	No	3.6	0.61	2.44	1.28	No	No	No	132	80	11.25	CC	AA	GG	AA	GG	TT	GG	4.32
97	Control group	61	Male	24.14	8000	Primary school and below	Farmer	No	No	5.13	3.49	1.65	2.14	No	No	No	132	80	6.35	CC	AA	GG	AA	GG	TT	GG	5.15
98	Control group	62	Female	24.14	19000	Primary school and below	Farmer	No	No	4.64	3.11	1.28	2.03	No	No	No	130	78	6.18	CC	AA	GG	AA	GG	TT	GG	12.64
99	Control group	62	Male	22.98	16500	Primary school and below	Farmer	No	No	5.73	0.96	2.86	1.76	No	No	No	130	78	8.79	CC	AA	GG	AA	GG	TT	GG	11.32
100	Control group	63	Male	22.98	16000	Primary school and below	Farmer	No	No	5.24	0.58	2.49	1.42	No	No	No	128	76	8.62	CC	AA	GG	AA	GG	TT	GG	4.81
101	Control group	60	Female	23.32	17500	Primary school and below	Farmer	No	No	5.91	0.87	1.71	0.85	No	No	No	136	84	6.04	CC	AA	GG	AA	GG	TT	GG	25.58
102	Control group	61	Male	23.32	15000	Primary school and below	Farmer	No	No	5.42	0.49	1.34	0.79	No	No	No	134	82	5.87	CC	AA	GG	AA	GG	TT	GG	21.79
103	Control group	64	Male	22.93	18000	Primary school and below	Farmer	No	No	5.99	1.48	2.8	0.71	No	No	No	126	74	8.61	CC	AA	GG	AA	GG	TT	GG	11.48
104	Control group	65	Female	22.93	14000	Primary school and below	Farmer	No	No	5.5	1.1	2.43	2.56	No	No	No	128	76	8.44	CC	AA	GG	AA	GG	TT	GG	17.35
105	Control group	65	Female	25.57	17000	Primary school and below	Farmer	No	No	3.69	1.59	1.62	1.69	No	No	No	132	80	7.44	CC	AA	GG	AA	GG	TT	GG	18.03
106	Control group	66	Male	25.57	12000	Primary school and below	Farmer	No	No	3.2	1.21	1.25	0.78	No	No	No	130	78	7.27	CC	AA	GG	AA	GG	TT	GG	15.48
107	Control group	56	Female	24.14	16000	Primary school and below	Farmer	No	No	2.85	0.62	2.56	1.47	No	No	No	134	82	6.52	CC	AA	GG	AA	GG	TT	GG	16.39
108	Control group	57	Male	24.14	18000	Primary school and below	Farmer	No	No	2.36	1.24	2.19	1.93	No	No	No	132	80	6.35	CC	AA	GG	AA	GG	TT	GG	14.72
109	Control group	67	Female	21.46	19500	Primary school and below	Farmer	No	No	1.99	1.65	3.11	0.52	No	No	No	132	80	2.81	CC	AA	GG	AA	GG	TT	GG	16.38
110	Control group	68	Male	21.46	17500	Primary school and below	Farmer	No	No	3.5	1.27	2.74	2.12	No	No	No	130	84	2.64	CC	AA	GG	AA	GG	TT	GG	17.42
111	Control group	68	Female	22.15	19000	Primary school and below	Farmer	No	No	4.12	5.06	2.94	1.78	No	No	No	136	84	5.75	CC	AA	GG	AA	GG	TT	GG	16.23
112	Control group	69	Male	22.15	15000	Primary school and below	Farmer	No	No	3.63	3.68	2.57	1.07	No	No	No	134	82	5.58	CC	AA	GG	AA	GG	TT	GG	15.59
113	Control group	59	Male	24.57	16000	Primary school and below	Farmer	No	No	4.23	4.97	1.71	1.84	No	No	No	132	80	10.5	CC	AA	GG	AA	GG	TT	GG	5.54
114	Control group	50	Female	22.98	28000	Primary school and below	Farmer	No	No	3.26	3.43	2.15	1.73	No	No	No	130	78	5.49	CT	AA	GG	AA	GG	TT	GG	13.36
115	Control group	49	Female	23.32	14000	Primary school and below	Farmer	No	No	4.81	1.25	2.39	1.73	No	No	No	126	74	6.66	CT	AA	GG	AA	GG	TT	GG	17.42
116	Control group	51	Male	23.32	29000	Primary school and below	Farmer	No	No	1.32	0.87	2.02	2.14	No	No	No	124	72	6.49	CT	AA	GG	AA	GG	TT	GG	16.56
117	Control group	52	Male	22.93	12000	Primary school and below	Farmer	No	No	3.9	0.92	1.35	2.14	No	No	No	134	82	6.5	CT	AA	GG	AA	GG	TT	GG	7.83
118	Control group	52	Female	22.93	30000	Primary school and below	Farmer	No	No	3.41	0.54	0.98	1.76	No	No	No	126	74	6.33	CT	AA	GG	AA	GG	TT	GG	24.54
119	Control group	53	Male	25.57	11000	Primary school and below	Farmer	No	No	2.99	0.81	3.01	1.76	No	No	No	132	80	5.71	CT	AA	GG	AA	GG	TT	GG	23.45
161	Control group	64	Female	22.92	25000	Junior high school	Worker	No	No	4.09	0.66	2.56	1.07	No	No	No	130	78	1.81	CT	AA	GG	AA	GG	TT	GG	24.81
162	Control group	65	Female	22.92	24000	Junior high school	Worker	No	No	3.6	0.28	2.19	0.65	No	No	No	134	82	6.64	CT	AA	GG	AA	GG	TT	GG	9.67
120	Control group	53	Male	25.57	25000	Primary school and below	Farmer	No	No	2.5	1.43	2.64	0.85	No	No	No	130	78	5.54	CT	AA	GG	AA	GG	TT	GG	16.4
121	Control group	52	Male	24.14	11500	Primary school and below	Farmer	No	No	2.12	1.76	2.33	0.85	No	No	No	128	76	4.21	CT	AA	GG	AA	GG	TT	GG	14.72
122	Control group	54	Female	24.14	26000	Primary school and below	Farmer	No	No	1.63	1.38	1.96	0.71	No	No	No	134	82	4.04	CT	AA	GG	AA	GG	TT	GG	13.4
123	Control group	53	Male	21.46	13000	Primary school and below	Farmer	No	No	4.23	0.85	4.45	0.71	No	No	No	130	78	4.03	CT	AA	GG	AA	GG	TT	GG	17.66
124	Control group	55	Male	21.46	24000	Primary school and below	Worker	No	No	3.74	0.47	6.08	0.68	No	No	No	128	76	3.86	CT	AA	GG	AA	GG	TT	GG	18.87
125	Control group	54	Female	22.15	14000	Junior high school	Worker	No	No	4.34	0.98	1.94	0.68	No	No	No	134	82	9.95	CT	AA	GG	AA	GG	TT	GG	14.67
126	Control group	57	Male	22.15	25000	Junior high school	Worker	No	No	3.85	0.6	1.57	1.47	No	No	No	132	80	9.78	CT	AA	GG	AA	GG	TT	GG	11.82
127	Control group	55	Male	24.57	14000	Junior high school	Worker	No	No	5.45	1.07	1.99	1.47	No	No	No	136	84	8.71	CT	AA	GG	AA	GG	TT	GG	18.81
128	Control group	56	Female	24.57	22000	Junior high school	Worker	No	No	6.96	0.69	1.62	0.52	No	No	No	134	82	8.54	CT	AA	GG	AA	GG	TT	GG	20.33
129	Control group	56	Female	24.12	25000	Junior high school	Worker	No	No	4.56	1.39	2.21	0.52	No	No	No	130	78	5.7	CT	AA	GG	AA	GG	TT	GG	19.54
130	Control group	57	Male	24.12	32000	Junior high school	Worker	No	No	4.07	1.01	1.84	1.78	No	No	No	130	78	5.53	CT	AA	GG	AA	GG	TT	GG	23.55
131	Control group	57	Male	23.66	22000	Junior high school	Worker	No	No	7.65	1.5	1.74	1.78	No	No	No	136	84	7.42	CT	AA	GG	AA	GG	TT	GG	13.83
132	Control group	56	Female	23.66	40000	Junior high school	Worker	No	No	7.16	1.12	2.37	0.77	No	No	No	134	82	7.25	CT	AA	GG	AA	GG	TT	GG	20.44
133	Control group	58	Male	24.4	32000	Junior high school	Worker	No	No	4.84	1.61	2.75	1.84	No	No	No	134	82	2.35	CT	AA	GG	AA	GG	TT	GG	17.46
134	Control group	59	Female	24.4	45000	Junior high school	Worker	No	No	4.35	1.23	2.38	1.93	No	No	No	132	80	2.18	CT	AA	GG	AA	GG	TT	GG	16.51
135	Control group	59	Male	23.14	40000	Junior high school	Worker	No	No	7.62	1.1	5.53	1.93	No	No	No	132	80	11.79	CT	AA	GG	AA	GG	TT	GG	17.86
136	Control group	60	Female	23.14	33000	Junior high school	Worker	No	No	7.13	0.72	5.16	0.86	No	No	No	130	78	11.62	CT	AA	GG	AA	GG	TT	GG	16.34
137	Control group	63	Male	22.97	45000	Junior high school	Worker	No	No	5.54	0.98	3.26	0.86	No	No	No	128	76	4.04	CT	AA	GG	AA	GG	TT	GG	23.54
138	Control group	64	Male	22.97	28000	Junior high school	Worker	No	No	5.05	0.6	2.89	0.74	No	No	No	130	86	3.87	CT	AA	GG	AA	GG	TT	GG	15.53
139	Control group	64	Female	23.25	33000	Junior high school	Worker	No	No	4.76	1.49	1.8	0.74	No	No	No	136	84	12.61	CT	AA	GG	AA	GG	TT	GG	18.49
140	Control group	65	Female	23.25	45000	Junior high school	Worker	No	No	4.27	1.11	1.43	1.51	No	No	No	132	80	8.44	CT	AA	GG	AA	GG	TT	GG	14.37
141	Control group	65	Male	23.57	28000	Junior high school	Worker	No	No	3.55	1.62	1.89	1.51	No	No	No	126	74	7.44	CT	AA	GG	AA	GG	TT	GG	16.85
142	Control group	66	Female	23.57	32000	Junior high school	Worker	No	No	3.06	1.24	1.52	1.62	No	No	No	124	72	7.27	CT	AA	GG	AA	GG	TT	GG	17.7
143	Control group	66	Female	23.66	45000	Junior high school	Worker	No	No	5.79	2.84	3.18	1.62	No	No	No	130	78	6.52	CT	AA	GG	AA	GG	TT	GG	21.02
144	Control group	67	Male	23.66	36000	Junior high school	Worker	No	No	5.3	2.46	2.81	1.74	No	No	No	128	76	6.35	CT	AA	GG	AA	GG	TT	GG	18.42
145	Control group	67	Male	23.88	32000	Junior high school	Worker	No	No	4.9	2.37	3.14	2.24	No	No	No	132	80	2.81	CT	AA	GG	AA	GG	TT	GG	11.71
146	Control group	68	Female	23.88	27000	Junior high school	Worker	No	No	4.41	1.99	2.77	1.02	No	No	No	130	78	2.64	CT	AA	GG	AA	GG	TT	GG	18.02
147	Control group	68	Male	23.76	36000	Junior high school	Worker	No	No	2.03	2.49	7.43	2.03	No	No	No	126	74	6.75	CT	AA	GG	AA	GG	TT	GG	20.22
148	Control group	69	Male	23.76	25000	Junior high school	Worker	No	No	1.54	2.11	9.44	1.42	No	No	No	136	84	6.58	CT	AA	GG	AA	GG	TT	GG	18.45
149	Control group	69	Female	23.87	27000	Junior high school	Worker	No	No	5.14	0.96	2.81	1.42	No	No	No	134	82	7.5	CT	AA	GG	AA	GG	TT	GG	20.46
150	Control group	70	Male	23.87	27000	Junior high school	Worker	No	No	4.65	0.58	4.44	0.79	No	No	No	132	80	7.33	CT	AA	GG	AA	GG	TT	GG	14.46
151	Control group	70	Female	24.32	25000	Junior high school	Worker	No	No	5.32	0.87	1.65	0.79	No	No	No	132	80	6.01	CT	AA	GG	AA	GG	TT	GG	20.44
152	Control group	71	Female	24.32	28000	Junior high school	Worker	No	No	4.83	0.49	1.28	1.17	No	No	No	130	78	5.84	CT	AA	GG	AA	GG	TT	GG	5.46
153	Control group	61	Male	24.71	27000	Junior high school	Worker	No	No	5.61	1.48	1.86	1.17	No	No	No	132	80	3.8	CT	AA	GG	AA	GG	TT	GG	16.51
154	Control group	62	Male	24.71	29000	Junior high school	Worker	No	No	5.12	1.1	2.49	0.78	No	No	No	130	78	3.63	CT	AA	GG	AA	GG	TT	GG	15.77
155	Control group	72	Female	24.03	28000	Junior high school	Worker	No	No	4.75	0.59	0.7	0.78	No	No	No	134	82	7.75	CT	AA	GG	AA	GG	TT	GG	16.34
156	Control group	73	Male	24.03	30000	Junior high school	Worker	No	No	4.26	0.21	0.33	1.11	No	No	No	132	80	7.58	CT	AA	GG	AA	GG	TT	GG	17.57
157	Control group	73	Female	23.91	29000	Junior high school	Worker	No	No	4.86	1.62	1.8	2.13	No	No	No	128	76	12.58	CT	AA	GG	AA	GG	TT	GG	15.56
158	Control group	74	Male	23.91	25000	Junior high school	Worker	No	No	2.37	1.24	1.43	0.64	No	No	No	126	84	7.41	CT	AA	GG	AA	GG	TT	GG	27.7
159	Control group	62	Male	23.15	30000	Junior high school	Worker	No	No	4.88	1.65	2.62	1.12	No	No	No	132	80	4.8	CT	AA	GG	AA	GG	TT	GG	5.46
160	Control group	64	Female	23.15	26000	Junior high school	Worker	No	No	4.39	1.27	1.25	1.74	No	No	No	130	78	4.63	CT	AA	GG	AA	GG	TT	GG	14.06
163	Control group	66	Female	21.11	26000	Junior high school	Worker	No	No	5.13	1.97	3.11	0.96	No	No	No	136	84	6.89	CT	AA	GG	AA	GG	TT	GG	18.95
164	Control group	66	Male	21.11	25000	Junior high school	Worker	No	No	4.64	1.59	2.74	2.06	No	No	No	134	82	6.72	CT	AA	GG	AA	GG	TT	GG	11.56
165	Control group	65	Female	21.86	24000	Junior high school	Worker	No	No	5.73	0.82	2.94	0.92	No	No	No	132	80	7.82	CT	AA	GG	AA	GG	TT	GG	17.82
166	Control group	67	Female	21.86	22000	Junior high school	Worker	No	No	5.24	0.44	1.57	0.88	No	No	No	130	78	7.65	CT	AA	GG	AA	GG	TT	GG	20.55
167	Control group	71	Male	22.34	28000	Junior high school	Worker	No	No	5.91	1.84	1.71	0.85	No	No	No	134	82	2.39	CT	AA	GG	AA	GG	TT	GG	13.37
168	Control group	72	Male	22.34	32000	Junior high school	Worker	No	No	5.42	1.46	1.34	1.52	No	No	No	132	80	2.22	CT	AA	GG	AA	GG	TT	GG	15.62
169	Control group	68	Female	22.88	29000	Junior high school	Worker	No	No	5.99	0.99	2.46	1.35	No	No	No	132	80	7.01	CT	AA	GG	AA	GG	TT	GG	14.75
170	Control group	69	Male	22.88	40000	Junior high school	Worker	No	No	5.5	0.61	2.09	0.94	No	No	No	134	82	6.84	CT	AA	GG	AA	GG	TT	GG	9.03
171	Control group	70	Male	19.95	30000	Junior high school	Worker	No	No	3.69	2.49	2.69	1.94	No	No	No	130	78	7.24	CT	AA	GG	AA	GG	TT	GG	19.53
172	Control group	70	Female	19.95	45000	Junior high school	Worker	No	No	3.2	2.11	2.32	0.48	No	No	No	128	76	7.07	CT	AA	GG	AA	GG	TT	GG	29.7
173	Control group	70	Female	20.77	25000	Junior high school	Worker	No	No	3.85	0.96	3.78	1.76	No	No	No	136	84	9.29	CT	AA	GG	AA	GG	TT	GG	30.52
174	Control group	71	Male	20.77	33000	Junior high school	Worker	No	No	3.36	0.58	3.41	1.15	No	No	No	134	82	9.12	CT	AA	GG	AA	GT	TT	GG	4.41
175	Control group	72	Male	21.56	26000	Junior high school	Worker	No	No	3.6	0.87	0.6	1.11	No	No	No	134	82	3.44	CT	AA	GG	AA	GT	TT	GG	18.95
176	Control group	72	Female	21.56	28000	Junior high school	Worker	No	No	3.11	0.49	0.23	1.66	No	No	No	132	80	3.27	CT	AA	GG	AA	GT	TT	GG	17.4
177	Control group	72	Male	22.32	24000	Junior high school	Worker	No	No	4.92	1.48	1.53	0.64	No	No	No	136	84	2.91	CT	AC	GG	AA	GT	TT	GG	12.9
178	Control group	73	Male	22.32	45000	Junior high school	Worker	No	No	4.43	1.1	2.18	0.95	No	No	No	134	82	2.74	CT	AA	GG	AA	GT	TT	GG	20.55
179	Control group	60	Male	24.57	16000	Primary school and below	Farmer	No	No	3.74	3.59	1.34	0.96	No	No	No	130	78	10.33	CT	AA	GG	AA	GG	TT	GG	21.2
180	Control group	71	Female	24.12	14000	Primary school and below	Farmer	No	No	4.34	1.82	2.46	1.63	No	No	No	132	80	6.01	CT	AA	GG	AA	GG	TT	GG	26.54
181	Control group	71	Male	24.12	14000	Primary school and below	Farmer	No	No	3.85	1.44	2.09	1.92	No	No	No	130	86	5.84	CT	AA	GG	AA	GG	TT	GG	27.62
182	Control group	70	Female	23.66	16500	Primary school and below	Farmer	No	No	2.45	1.65	1.8	0.86	No	No	No	130	78	6.8	CT	AA	GG	AA	GG	TT	GG	6.4
183	Control group	72	Female	23.66	12000	Primary school and below	Worker	No	No	1.76	1.27	1.43	0.85	No	No	No	136	84	6.63	CT	AA	GG	AA	GG	TT	GG	7.23
184	Control group	76	Male	24.4	17500	Primary school and below	Worker	No	No	4.56	1.66	1.89	0.74	No	No	No	132	80	7.75	CT	AA	GG	AA	GG	TT	GG	3.4
185	Control group	78	Male	24.4	11000	Primary school and below	Worker	No	No	4.07	1.28	1.52	1.35	No	No	No	130	78	7.58	CT	AA	GG	AA	GG	TT	GG	6.89
186	Control group	62	Female	23.14	18000	Junior high school	Worker	No	No	4.65	0.97	6.18	1.51	No	No	No	136	84	8.58	CT	AA	GG	AA	GG	TT	GG	23.87
187	Control group	62	Male	23.14	15000	Junior high school	Worker	No	No	4.16	0.59	7.81	0.98	No	No	No	134	82	8.41	CT	AA	GG	AA	GG	TT	GG	13.56
188	Control group	63	Male	22.97	17000	Junior high school	Worker	No	No	2.84	1.82	3.14	1.62	No	No	No	134	82	4.8	CT	AA	GG	AA	GG	TT	GG	20.11
189	Control group	63	Male	22.97	13000	Junior high school	Worker	No	No	2.35	1.44	1.77	1.76	No	No	No	132	80	4.63	CT	AA	GG	AA	GG	TT	GG	17.56
190	Control group	64	Female	23.25	16000	Junior high school	Worker	No	No	1.63	0.84	2.89	1.28	No	No	No	136	84	5.81	CT	AA	GG	AA	GG	TT	GG	16.8
191	Control group	64	Male	23.25	14000	Junior high school	Worker	No	No	1.14	0.46	2.52	1.24	No	No	No	134	82	5.64	CT	AA	GG	AA	GG	TT	GG	18.46
192	Control group	65	Male	23.57	19500	Junior high school	Worker	No	No	3.75	0.99	2.81	2.03	No	No	No	126	74	6.89	CT	AA	GG	AA	GG	TT	GG	18.31
193	Control group	65	Male	23.57	16500	Junior high school	Worker	No	No	3.26	0.61	1.44	0.64	No	No	No	136	84	6.72	CT	AA	GG	AA	GG	TT	GG	17.67
194	Control group	69	Female	23.66	19000	Junior high school	Worker	No	No	3.81	1.49	2.65	1.42	No	No	No	132	80	7.82	CT	AA	GG	AA	GG	TT	GG	17.14
195	Control group	69	Male	23.66	17500	Junior high school	Worker	No	No	3.32	2.11	2.28	1.74	No	No	No	136	84	7.65	CT	AA	GG	AA	GG	TT	GG	16.35
196	Control group	59	Female	23.88	16000	Junior high school	Worker	No	No	2.9	0.96	0.85	0.79	No	No	No	134	82	5.39	CT	AA	GG	AA	GG	TT	GG	13.42
197	Control group	57	Male	23.88	18000	Junior high school	Worker	No	No	2.41	0.58	2.49	1.65	No	No	No	132	80	5.22	CT	AA	GG	AA	GG	TT	GG	24.76
198	Control group	62	Female	23.76	15000	Junior high school	Worker	No	No	3.99	1.87	5.71	2.56	No	No	No	132	80	8.01	CT	AA	GG	AA	GG	TT	GG	7.32
199	Control group	62	Female	23.76	17000	Junior high school	Worker	No	No	3.5	1.49	8.34	2.06	No	No	No	130	78	7.84	CT	AA	GG	AA	GG	TT	GG	26.36
200	Control group	63	Male	23.87	14000	Junior high school	Worker	No	No	4.12	3.48	1.8	0.58	No	No	No	136	84	7.24	CT	AA	GG	AA	GG	TT	GG	10.85
201	Control group	63	Male	23.87	16000	Junior high school	Worker	No	No	3.63	2.1	1.43	1.89	No	No	No	134	82	7.07	CT	AA	GG	AA	GG	TT	GG	15.28
202	Control group	64	Male	24.32	12000	Junior high school	Worker	No	No	4.23	1.59	1.62	2.13	No	No	No	132	80	10.29	CT	AA	GG	AA	GG	TT	GG	20.48
203	Control group	64	Female	24.32	19500	Junior high school	Worker	No	No	3.74	1.21	1.25	1.52	No	No	No	134	82	10.12	CT	AA	GG	AA	GG	TT	GG	14.21
204	Control group	65	Male	24.71	22000	Junior high school	Worker	No	No	4.34	2.62	2.96	1.12	No	No	No	134	82	5.44	CT	AA	GG	AA	GG	TT	GG	11.49
205	Control group	65	Male	24.71	19000	Junior high school	Worker	No	No	3.85	1.24	2.59	2.44	No	No	No	136	84	5.27	CT	AA	GG	AA	GG	TT	GG	14.48
206	Control group	66	Female	24.03	24000	Junior high school	Worker	No	No	4.45	1.65	7.11	1.07	No	No	No	136	84	6.91	CT	AA	GG	AA	GG	TT	GG	21.37
207	Control group	66	Male	24.03	16000	Junior high school	Worker	No	No	3.96	1.27	6.74	0.47	No	No	No	134	82	6.74	CT	AA	GG	AA	GG	TT	GG	14.86
208	Control group	67	Male	23.91	21000	Junior high school	Worker	No	No	8.56	0.66	2.94	0.96	No	No	No	132	80	7.61	CT	AA	GG	AA	GG	TT	GG	22.75
209	Control group	67	Male	23.91	15000	Junior high school	Worker	No	No	8.27	1.28	2.57	1.02	No	No	No	130	78	7.44	CT	AA	GG	AA	GG	TT	GG	29.86
210	Control group	62	Female	23.15	30000	Junior high school	Worker	No	No	4.65	0.97	1.75	0.92	No	No	No	136	84	5.9	CT	AA	GG	AA	GG	TT	GG	4.43
211	Control group	62	Male	23.15	14000	Junior high school	Worker	No	No	4.16	0.59	1.38	1.78	No	No	No	134	82	5.73	CT	AA	GG	AA	GG	TT	GG	28.46
212	Control group	53	Male	22.92	21000	Junior high school	Worker	No	No	7.84	2.82	2.46	0.85	No	No	No	134	82	7.55	CT	AA	GG	AA	GG	TT	GG	31.43
213	Control group	53	Male	22.92	12000	Junior high school	Worker	No	No	5.35	2.44	2.09	0.75	No	No	No	132	80	7.38	CT	AA	GG	AA	GG	TT	GG	11.46
214	Control group	64	Female	21.11	23000	Junior high school	Worker	No	No	4.62	1.84	1.69	1.35	No	No	No	136	84	5.74	CT	AA	GG	AA	GG	TT	GG	18.45
215	Control group	64	Female	21.11	11000	Junior high school	Worker	No	No	3.13	1.46	1.32	1.93	No	No	No	134	82	5.57	CT	AA	GG	AA	GG	TT	GG	19.54
216	Control group	65	Male	21.86	32000	Junior high school	Worker	No	No	5.54	0.99	1.78	0.98	No	No	No	136	84	7.26	CT	AA	GG	AA	GG	TT	GG	20.55
217	Control group	65	Male	21.86	11500	Junior high school	Worker	No	No	5.05	0.61	1.41	0.86	No	No	No	138	84	7.09	CT	AA	GG	AA	GG	TT	GG	14.46
218	Control group	66	Female	22.34	36000	Junior high school	Worker	No	No	4.76	1.65	1.56	1.76	No	No	No	132	80	6.7	CT	AA	GG	AA	GG	TT	GG	13.83
219	Control group	66	Male	22.34	13000	Junior high school	Worker	No	No	4.27	1.27	2.23	0.74	No	No	No	130	78	6.53	CT	AA	GG	AA	GG	TT	GG	20.44
220	Control group	67	Male	22.88	40000	Junior high school	Worker	No	No	3.55	1.66	1.51	2.13	No	No	No	134	82	6.01	CT	AC	GG	AA	GT	TT	GG	5.25
221	Control group	67	Female	22.88	14000	Junior high school	Worker	No	No	3.06	1.28	1.14	1.51	No	No	No	132	80	5.84	CT	AA	GG	AA	GT	TT	GG	17.46
222	Control group	59	Male	19.95	24000	Junior high school	Worker	No	No	5.79	0.97	3.34	0.64	No	No	No	132	80	10.38	CT	AC	GG	AA	GT	TT	GG	16.51
223	Control group	59	Male	19.95	18000	Junior high school	Worker	No	No	5.3	0.59	2.97	0.62	No	No	No	132	86	7.21	CT	AC	GG	AA	GT	TT	GG	11.77
224	Control group	60	Male	20.77	25000	Junior high school	Worker	No	No	4.9	1.82	1.23	1.74	No	No	No	136	84	7.53	CT	AC	GG	AA	GT	TT	GG	13.86
225	Control group	60	Female	20.77	17500	Junior high school	Worker	No	No	4.41	1.44	0.86	1.23	No	No	No	134	82	7.36	CT	AC	GG	AA	GT	TT	GG	16.34
226	Control group	61	Female	21.56	27000	Junior high school	Worker	No	No	4.03	1.44	1.16	1.65	No	No	No	132	80	8.89	CT	AC	GG	AA	GT	TT	GG	15.57
227	Control group	73	Male	21.73	25000	Junior high school	Worker	No	No	8.46	1.59	1.34	1.74	No	No	No	134	82	14.61	TT	AC	GG	AA	GT	TT	GG	19.48
228	Control group	75	Female	21.73	32000	Junior high school	Worker	No	No	5.97	1.21	0.97	0.58	No	No	No	136	84	9.44	TT	AC	GG	AA	GT	TT	GG	20.31
229	Control group	51	Female	21.17	22000	Junior high school	Worker	No	No	4.54	1.62	1.24	0.65	No	No	No	132	80	5.9	TT	AC	GG	AA	GT	TT	GG	16.53
230	Control group	53	Male	21.17	36000	Junior high school	Worker	No	No	4.05	1.24	1.86	1.39	No	No	No	130	82	5.73	TT	AC	GG	AA	GT	TT	GG	11.31
231	Control group	57	Male	19.66	32000	Junior high school	Worker	No	No	4.95	0.65	1.16	2.06	No	No	No	124	72	7.55	TT	AC	GG	AA	GT	TT	GG	11.7
232	Control group	59	Male	19.66	27000	Junior high school	Worker	No	No	4.46	0.27	0.79	1.42	No	No	No	130	78	7.38	TT	AC	GG	AA	GT	TT	GG	16.23
233	Control group	53	Female	20.75	40000	Junior high school	Worker	No	No	5.01	1.66	3.02	0.88	No	No	No	130	78	5.74	TT	AC	GG	AA	GT	TT	GG	20.29
234	Control group	55	Male	20.75	25000	Junior high school	Worker	No	No	4.52	1.28	2.65	1.41	No	No	No	128	76	5.57	TT	AC	GG	AA	GT	TT	GG	19.43
235	Control group	54	Male	21.51	45000	Junior high school	Worker	No	No	5.09	1.97	2.52	1.52	No	No	No	126	74	7.26	TT	AC	GG	AA	GT	TT	GG	10.7
236	Control group	56	Female	21.51	28000	Junior high school	Worker	No	No	4.6	1.59	2.15	1.27	No	No	No	138	86	7.09	TT	AC	GG	AA	GT	TT	GG	27.41
237	Control group	56	Male	15.98	33000	Junior high school	Worker	No	No	5.24	4.82	3.43	0.44	No	No	No	128	76	6.54	TT	AC	GG	AA	GT	TT	GG	36.32
238	Control group	57	Male	15.98	29000	Junior high school	Worker	No	No	4.75	3.44	3.06	1.59	No	No	No	130	78	6.37	TT	AC	GG	AA	GT	TT	GG	29.27
239	Control group	56	Male	16.73	28000	Senior high school and above	Worker	No	No	3.8	0.84	2.81	1.37	No	No	No	130	78	10.4	TT	AC	GG	AA	GT	TT	GG	17.59
240	Control group	58	Female	16.73	30000	Senior high school and above	Worker	No	No	3.31	0.46	2.44	0.73	No	No	No	132	80	10.23	TT	AC	GG	AA	GT	TT	GG	6.27
241	Control group	57	Male	20.97	45000	Senior high school and above	Worker	No	No	3.46	0.99	2.65	1.15	No	No	No	134	82	7.33	TT	AC	GG	AA	GT	TT	GG	20.53
242	Control group	59	Male	20.97	25000	Senior high school and above	Civil servant	No	No	1.97	0.61	2.28	0.82	No	No	No	132	80	7.16	TT	AC	GG	AA	GT	TT	GG	21.74
243	Control group	54	Male	21.6	32000	Senior high school and above	Civil servant	No	No	2.63	1.67	2.04	0.66	No	No	No	128	76	6.65	TT	AC	GG	AA	GT	TT	GG	7.54
244	Control group	56	Female	21.6	26000	Senior high school and above	Civil servant	No	No	2.14	1.29	1.67	1.73	No	No	No	126	74	6.48	TT	AC	GG	AA	GT	TT	GG	14.69
245	Control group	59	Female	22.77	36000	Senior high school and above	Civil servant	No	No	3.75	0.81	3.7	0.95	No	No	No	130	78	8.33	TT	AC	GG	AA	GT	TT	GG	21.68
246	Control group	61	Male	22.77	24000	Senior high school and above	Teacher	No	No	3.26	0.43	3.33	2.64	No	No	No	128	76	8.16	TT	AC	GG	AA	GT	TT	GG	23.2
247	Control group	63	Female	26.36	27000	Senior high school and above	Teacher	No	No	7.81	1.25	3.59	0.58	No	No	No	134	82	7.81	TT	AC	GG	AG	GT	TT	GG	32.41
248	Control group	64	Male	26.36	25000	Senior high school and above	Teacher	No	No	7.32	0.87	3.22	1.76	No	No	No	136	84	7.64	TT	AC	GG	AG	GT	TT	GG	26.42
249	Control group	64	Female	22.72	25000	Senior high school and above	Teacher	No	No	3.9	0.92	1.76	1.39	No	No	No	136	84	5.46	TT	AC	GG	AG	GT	TT	GG	6.7
250	Control group	65	Male	22.72	22000	Senior high school and above	Civil servant	No	No	3.41	0.54	3.41	0.85	No	No	No	134	82	5.29	TT	AC	GG	AG	GT	TT	GG	23.31
251	Control group	65	Female	26.05	29000	Senior high school and above	Civil servant	No	No	4.99	0.81	3.05	1.42	No	No	No	128	76	6.54	TT	AC	GG	AG	GT	TT	GG	20.33
252	Control group	66	Male	26.05	32000	Senior high school and above	Civil servant	No	No	3.5	0.43	2.68	0.71	No	No	No	126	74	6.37	TT	AC	GG	AG	GT	TT	GG	19.38
253	Control group	66	Male	22.14	27000	Senior high school and above	Civil servant	No	No	4.12	1.76	1.66	2.41	No	No	No	132	80	5.92	TT	AC	GG	AG	GT	TT	GG	20.73
254	Control group	68	Male	22.14	40000	Senior high school and above	Civil servant	No	No	3.63	1.38	1.29	0.58	No	No	No	130	78	5.75	TT	AC	GG	AG	GT	TT	GG	19.21
255	Control group	67	Female	22.03	28000	Senior high school and above	Civil servant	No	No	2.23	0.75	2.74	1.27	No	No	No	130	78	1.99	TT	AC	GG	AG	GT	TT	GG	26.41
256	Control group	69	Female	22.03	45000	Senior high school and above	Civil servant	No	No	1.74	0.37	2.37	1.47	No	No	No	128	76	6.82	TT	AC	GG	AG	GT	TT	GG	8.4
257	Control group	69	Male	22.2	29000	Senior high school and above	Civil servant	No	No	4.34	0.98	1.85	1.59	No	No	No	136	84	2.1	TT	AC	GG	AG	GT	TT	GG	21.36
258	Control group	69	Female	22.2	33000	Senior high school and above	Civil servant	No	No	3.85	0.6	1.48	0.52	No	No	No	134	82	5.93	TT	AC	GG	AG	GT	TT	GG	17.24
259	Control group	70	Female	22.37	30000	Senior high school and above	Civil servant	No	No	4.45	1.17	3.02	0.53	No	No	No	132	80	6.25	TT	AC	GG	AG	GT	TT	GG	19.72
260	Control group	70	Male	22.37	28000	Senior high school and above	Teacher	No	No	3.96	0.79	2.65	1.78	No	No	No	130	78	6.08	TT	AC	GG	AG	GT	TT	GG	20.57
261	Control group	70	Female	14.95	25000	Senior high school and above	Teacher	No	No	2.56	1.39	1.63	0.82	No	No	No	134	82	10.56	TT	AC	GG	AG	GT	TT	GG	23.89
262	Control group	72	Male	14.95	45000	Senior high school and above	Teacher	No	No	2.07	1.01	1.26	1.84	No	No	No	132	80	10.39	TT	AC	GG	AG	GT	TT	GG	31.29
263	Control group	71	Male	14.08	26000	Senior high school and above	Teacher	No	No	4.65	0.49	2.9	1.73	No	No	No	132	80	8.34	TT	AC	GG	AG	GT	TT	GG	14.58
264	Control group	72	Female	14.08	32000	Senior high school and above	Teacher	No	No	4.16	2.11	2.53	0.91	No	No	No	130	78	8.17	TT	AC	GG	AG	GT	TT	GG	20.89
265	Control group	67	Male	17.61	24000	Senior high school and above	Teacher	No	No	4.84	0.96	3.01	2.14	No	No	No	130	78	2.66	TT	AC	GG	AG	GT	TT	GG	23.09
266	Control group	69	Male	17.61	36000	Senior high school and above	Teacher	No	No	4.35	0.58	2.64	0.86	No	No	No	128	76	2.49	TT	AC	GG	AG	GT	TT	GG	21.32
267	Control group	73	Female	28.33	25000	Senior high school and above	Teacher	No	No	3.63	0.87	2.04	1.76	No	No	No	136	84	7.66	TT	AC	GG	AG	GT	TT	GG	33.33
268	Control group	74	Female	28.33	27000	Senior high school and above	Teacher	No	No	3.14	0.49	2.71	0.74	No	No	No	134	82	7.49	TT	AC	GG	AG	GT	TT	GG	17.33
269	Control group	63	Male	29.56	22000	Senior high school and above	Teacher	No	No	3.75	1.48	2.23	0.85	No	No	No	134	82	11.5	TT	CC	GG	AG	GT	TT	GG	23.31
270	Control group	65	Female	29.56	25000	Senior high school and above	Teacher	No	No	3.26	1.1	1.86	1.51	No	No	No	132	80	7.33	TT	AC	GG	AG	GT	TT	GG	8.33
271	Control group	64	Male	15.14	32000	Senior high school and above	Teacher	No	No	3.81	1.59	3.49	0.71	No	No	No	136	84	5.71	TT	CC	GG	AG	GT	TT	GG	19.38
272	Control group	66	Female	15.14	29000	Senior high school and above	Doctor	No	No	3.32	1.21	3.12	1.62	No	No	No	134	82	5.54	TT	CC	GG	AG	GT	TT	GG	18.64
273	Control group	65	Male	19.47	40000	Senior high school and above	Doctor	No	No	4.9	1.62	5.64	1.69	No	No	No	134	82	4.21	TT	CC	GG	AG	GT	TT	GG	9.21
274	Control group	66	Female	19.47	27000	Senior high school and above	Doctor	No	No	1.41	1.24	5.27	0.74	No	No	No	132	80	4.04	TT	CC	GG	AG	GT	TT	GG	20.44
275	Control group	66	Male	22.66	45000	Senior high school and above	Doctor	No	No	3.99	1.65	1.61	1.47	No	No	No	132	80	2.03	TT	CC	GG	AG	GT	TT	GG	18.43
276	Control group	67	Male	22.66	28000	Senior high school and above	Doctor	No	No	3.5	1.27	1.24	1.83	No	No	No	130	78	5.86	TT	CC	GG	AG	GT	TT	GG	30.57
277	Control group	67	Female	24.88	33000	Senior high school and above	Doctor	No	No	2.12	1.66	3.03	0.52	No	No	No	128	76	7.95	TT	CC	GG	AG	GT	TT	GG	8.33
278	Control group	68	Female	24.88	29000	Senior high school and above	Doctor	No	No	1.63	1.28	2.66	1.42	No	No	No	122	70	7.78	TT	CC	GG	AG	GT	TT	GG	16.93
279	Control group	68	Male	25.21	28000	Senior high school and above	Doctor	No	No	4.23	1.97	3.19	1.78	No	No	No	130	78	8.71	TT	CC	GG	AG	TT	TT	GG	37.68
280	Control group	69	Male	25.21	30000	Senior high school and above	Doctor	No	No	3.74	1.59	2.82	0.79	No	No	No	128	76	8.54	TT	CC	GG	AG	TT	TT	GG	12.54
281	Control group	69	Female	21.43	45000	Senior high school and above	Doctor	No	No	4.34	0.82	2.52	1.84	No	No	No	126	74	2.7	TT	CC	GG	AG	TT	TT	GG	4.43
282	Control group	70	Male	21.43	25000	Senior high school and above	Civil servant	No	No	3.85	0.44	2.15	0.58	No	No	No	124	72	6.53	TT	CC	GG	AG	TT	TT	GG	20.69
283	Control group	70	Male	22.98	15000	Senior high school and above	Civil servant	No	No	6.45	1.84	2.39	1.93	No	No	No	132	80	7.42	TT	CC	GG	AG	TT	TT	GG	6.24
284	Control group	71	Male	22.98	26000	Senior high school and above	Farmer	No	No	5.96	1.46	2.02	1.39	No	No	No	122	70	7.25	TT	CC	GG	AG	TT	TT	GG	18.49
285	Control group	71	Female	24.51	13000	Senior high school and above	Farmer	No	No	2.56	0.99	2.35	0.86	No	No	No	132	80	2.35	TT	CC	GG	AG	TT	TT	GG	11.9
286	Control group	61	Male	21.56	15000	Junior high school	Worker	No	No	5.54	1.06	0.79	2.53	No	No	No	130	84	13.72	TT	AC	GG	AA	GT	TT	GG	20.56
287	Control group	62	Male	22.32	28000	Junior high school	Worker	No	No	5.14	0.99	0.96	2.06	No	No	No	132	80	6.56	TT	AC	GG	AA	GT	TT	GG	19.48
288	Control group	62	Female	22.32	16000	Junior high school	Worker	No	No	4.65	0.61	0.59	1.39	No	No	No	138	86	6.39	TT	AC	GG	AA	GT	TT	GG	20.31
289	Control group	53	Male	21.73	29000	Junior high school	Worker	No	No	5.45	2.49	2.52	1.89	No	No	No	130	78	7.44	TT	AC	GG	AA	GT	TT	GG	6.53
290	Control group	53	Male	21.73	14000	Junior high school	Worker	No	No	5.96	1.11	1.15	1.42	No	No	No	128	76	7.27	TT	AC	GG	AA	GT	TT	GG	21.31
291	Control group	64	Female	21.17	30000	Junior high school	Worker	No	No	4.56	1.96	1.43	1.52	No	No	No	130	88	2.35	TT	AC	GG	AA	GT	TT	GG	17.7
292	Control group	64	Female	21.17	12000	Junior high school	Worker	No	No	4.07	1.58	1.06	2.71	No	No	No	128	74	2.18	TT	AC	GG	AA	GT	TT	GG	6.23
293	Control group	65	Male	19.66	25000	Senior high school and above	Worker	No	No	6.65	0.87	2.81	1.44	No	No	No	132	80	3.33	TT	AC	GG	AA	GT	TT	GG	20.29
294	Control group	65	Male	19.66	11000	Senior high school and above	Civil servant	No	No	3.16	0.49	1.35	1.27	No	No	No	130	78	5.16	TT	AC	GG	AA	GT	TT	GG	19.43
295	Control group	71	Female	20.75	26000	Senior high school and above	Civil servant	No	No	4.84	1.48	0.65	1.47	No	No	No	136	84	7.52	TT	AC	GG	AA	GT	TT	GG	15.7
296	Control group	71	Male	20.75	32000	Senior high school and above	Doctor	No	No	4.35	1.1	2.28	1.59	No	No	No	134	82	7.35	TT	AC	GG	AG	GT	TT	GG	29.41
297	Control group	76	Female	21.51	24000	Senior high school and above	Doctor	No	No	4.62	2.59	2.04	0.52	No	No	No	134	82	8.76	TT	AC	GG	AG	GT	TT	GG	31.32
298	Control group	76	Male	21.51	36000	Senior high school and above	Teacher	No	No	4.13	2.21	1.67	0.53	No	No	No	132	80	8.59	TT	AC	GG	AG	GT	TT	GG	9.27
299	Control group	68	Female	15.98	25000	Senior high school and above	Teacher	No	No	5.54	0.92	3.7	1.78	No	No	No	136	84	6.04	TT	AC	GG	AG	GT	TT	GG	7.59
300	Control group	68	Male	15.98	27000	Senior high school and above	Civil servant	No	No	5.35	0.54	0.46	0.52	No	No	No	134	82	5.87	TT	AC	GG	AG	GT	TT	GG	6.27
301	Control group	64	Male	16.73	22000	Senior high school and above	Civil servant	No	No	4.76	1.65	3.59	1.84	No	No	No	126	74	4.56	TT	AC	GG	AG	GT	TT	GG	30.53
302	Control group	64	Female	16.73	25000	Senior high school and above	Civil servant	No	No	4.27	1.27	1.22	0.65	No	No	No	122	78	3.36	TT	AC	GG	AG	GT	TT	GG	36.74
303	Control group	70	Female	20.97	32000	Senior high school and above	Civil servant	No	No	3.55	2.66	1.78	1.93	No	No	No	132	80	7.96	TT	AC	GG	AG	GT	TT	GG	22.3
304	Control group	70	Male	20.97	27000	Senior high school and above	Civil servant	No	No	3.06	2.28	1.41	1.74	No	No	No	130	78	7.79	TT	AC	GG	AG	GT	TT	GG	32.98
305	Control group	54	Female	21.6	40000	Senior high school and above	Civil servant	No	No	5.79	1.97	3.05	0.86	No	No	No	134	82	7.71	TT	AC	GG	AG	GT	TT	GG	21.34
306	Control group	54	Female	21.6	28000	Senior high school and above	Civil servant	No	No	5.3	1.59	2.68	2.76	No	No	No	138	78	7.54	TT	AC	GG	AG	GT	TT	GG	19.67
307	Control group	51	Male	22.77	45000	Senior high school and above	Civil servant	No	No	3.99	0.82	1.66	0.74	No	No	No	132	80	5.39	TT	AC	GG	AG	GT	TT	GG	32.37
308	Control group	51	Male	22.77	29000	Senior high school and above	Civil servant	No	No	3.5	1.44	1.29	1.85	No	No	No	132	80	5.22	TT	AC	GG	AG	GT	TT	GG	21.18
309	Control group	61	Female	26.36	33000	Senior high school and above	Civil servant	No	No	4.12	1.84	2.34	1.51	No	No	No	136	84	2.55	TT	AC	GG	AG	GT	TT	GG	10.49
310	Control group	61	Male	26.36	30000	Senior high school and above	Doctor	No	No	3.63	1.46	1.97	0.41	No	No	No	134	82	6.38	TT	AC	GG	AG	GT	TT	GG	20.01
311	Control group	62	Male	22.72	28000	Senior high school and above	Doctor	No	No	2.23	0.59	1.23	1.62	No	No	No	132	80	5.44	TT	AC	GG	AG	GT	TT	GG	32.35
312	Control group	63	Female	22.72	25000	Senior high school and above	Doctor	No	No	3.74	0.21	0.86	1.69	No	No	No	130	78	5.27	TT	AC	GG	AG	GT	TT	GG	16.29
313	Control group	61	Male	26.05	45000	Senior high school and above	Doctor	No	No	3.34	2.49	1.16	1.27	No	No	No	134	82	10.63	TT	CC	GG	AG	GT	TT	GG	11.32
314	Control group	62	Female	26.05	26000	Senior high school and above	Doctor	No	No	2.85	2.11	0.79	1.47	No	No	No	132	80	7.46	TT	AC	GG	AG	GT	TT	GG	4.19
315	Control group	54	Female	22.14	32000	Senior high school and above	Doctor	No	No	4.45	0.96	4.05	2.03	No	No	No	136	84	5.81	TT	CC	GG	AG	GT	TT	GG	26.61
316	Control group	56	Male	22.14	24000	Senior high school and above	Teacher	No	No	3.96	0.58	0.58	0.52	No	No	No	134	82	6.64	TT	CC	GG	AG	GT	TT	GG	3.72
324	Control group	69	Female	24.51	25000	Senior high school and above	Farmer	No	No	2.14	2.51	6.28	2.33	No	No	No	134	88	6.77	TT	CC	GG	AG	TT	TT	GG	25.62
325	Control group	59	Female	25.98	22000	Senior high school and above	Farmer	No	No	3.75	0.96	3.63	2.13	No	No	No	136	84	5.45	TT	CC	GG	AG	TT	TT	GG	14.65
317	Control group	63	Male	22.03	36000	Senior high school and above	Teacher	No	No	5.56	1.07	3.52	1.42	No	No	No	132	80	9.68	TT	CC	GG	AG	GT	TT	GG	22.24
318	Control group	64	Female	22.03	32000	Senior high school and above	Teacher	No	No	5.57	0.69	4.05	0.78	No	No	No	130	78	9.51	TT	CC	GG	AG	GT	TT	GG	23.35
319	Control group	56	Male	22.68	27000	Senior high school and above	Teacher	No	No	4.65	1.48	1.43	0.79	No	No	No	136	84	4.5	TT	CC	GG	AG	GT	TT	GG	36.63
320	Control group	57	Female	22.68	36000	Senior high school and above	Teacher	No	No	4.16	1.1	1.06	1.94	No	No	No	134	82	4.33	TT	CC	GG	AG	GT	TT	GG	4.36
321	Control group	67	Male	15.2	25000	Senior high school and above	Teacher	No	No	4.84	1.99	1.81	2.36	No	No	No	134	82	6.55	TT	CC	GG	AG	TT	TT	GG	22.11
322	Control group	68	Male	15.2	27000	Senior high school and above	Teacher	No	No	2.05	0.61	1.44	1.28	No	No	No	132	80	5.38	TT	CC	GG	AG	TT	TT	GG	34.24
323	Control group	68	Female	24.51	29000	Senior high school and above	Teacher	No	No	2.63	1.89	4.65	0.78	No	No	No	136	84	6.94	TT	CC	GG	AG	TT	TT	GG	16.3
326	Control group	61	Female	25.98	27000	Senior high school and above	Worker	No	No	3.26	0.58	1.26	1.42	No	No	No	136	84	5.28	TT	CC	GG	AG	TT	TT	GG	4.96
